1 **The Oncogenic Function of PLAGL2 is Mediated via Specific Target Genes Through a**  
2 **Wnt-independent Mechanism in Colorectal Cancer**

3

4 Anthony D. Fischer<sup>2</sup>, Daniel A. Veronese-Paniagua<sup>3</sup>, Shriya Swaminathan<sup>3</sup>, Hajime Kashima<sup>1</sup>,  
5 Deborah C. Rubin<sup>1</sup>, Blair B. Madison<sup>1</sup>

6 1. Department of Medicine, Division of Gastroenterology, Washington University School of  
7 Medicine, Saint Louis, MO 63110.

8 2. Department of Genetics, Washington University School of Medicine, Saint Louis, MO  
9 63110.

10 3. Washington University School of Medicine, Saint Louis, MO 63110.

11

12 Corresponding Author:

13 Blair B. Madison, Ph.D.

14 Assistant Professor

15 Washington University School of Medicine

16 Department of Medicine

17 Division of Gastroenterology

18 660 S. Euclid Ave.

19 Campus Box 8124

20 CSRB NT 923

21 St Louis MO 63110

22 Ph: 267-496-6670

23 Email: [bbmadison@gmail.com](mailto:bbmadison@gmail.com)

24

25 Running Title: PLAGL2 Drives Colorectal Epithelial Transformation Via Wnt-Independent  
26 Pathways

27 Keywords: Colorectal cancer, PLAGL2, IGF2, ASCL2, Wnt, intestinal epithelium

28 **ABSTRACT**

29           Colorectal cancer (CRC) tumorigenesis and progression are linked to common  
30 oncogenic mutations, especially in the tumor suppressor *APC*, whose loss triggers the  
31 deregulation of TCF4/ $\beta$ -Catenin activity. CRC tumorigenesis is also driven by multiple epi-  
32 mutational modifiers, such as transcriptional regulators. We describe the common (and near-  
33 universal) activation of the zinc finger transcription factor and Let-7 target PLAGL2 in CRC and  
34 find that it is a key driver of intestinal epithelial transformation. PLAGL2 drives proliferation, cell  
35 cycle progression, and anchorage-independent growth in CRC cell lines and non-transformed  
36 intestinal cells. Investigating effects of PLAGL2 on downstream pathways revealed very modest  
37 effects on canonical Wnt signaling. Alternatively, we find pronounced effects on the direct  
38 PLAGL2 target genes *IGF2*, a fetal growth factor, and *ASCL2*, an intestinal stem cell-specific  
39 bHLH transcription factor. Inactivation of PLAGL2 in CRC cell lines has pronounced effects on  
40 *ASCL2* reporter activity. Furthermore, *ASCL2* expression can partially rescue deficits of  
41 proliferation and cell cycle progression caused by depletion of PLAGL2 in CRC cell lines. Thus,  
42 the oncogenic effects of PLAGL2 appear to be mediated via core stem cell and onco-fetal  
43 pathways, with minimal effects on downstream Wnt signaling.

44

45 **INTRODUCTION**

46           Colorectal cancer (CRC) is the third most common of all human malignancies and is the  
47 second leading cause of cancer-related deaths, after lung/bronchus cancer  
48 ([seer.cancer.gov/statfacts](http://seer.cancer.gov/statfacts)). For over 20 years, the role of canonical Wnt signaling has been  
49 front and center for this malignancy, given the key role of the gatekeeper tumor suppressor,  
50 *APC*, which encodes a key scaffold protein in the  $\beta$ -Catenin destruction complex [1, 2].  
51 Mutations in other Wnt pathway components, such as *AXIN2*, *CTNNB1*, and *RSPO* genes [3]  
52 can also lead to hyperactive Wnt signaling in CRC. Mutations in *TP53*, *SMAD4*, and *KRAS* are  
53 also very common in CRC, underscoring the roles of pathways regulating genome integrity,

54 TGF $\beta$ /SMAD, and MAPK signaling. However, additional pathways are relevant in CRC  
55 pathogenesis, especially those pathways that drive an immature, fetal, or stem cell expression  
56 signature; such signatures predict an aggressive phenotype and poor prognosis [4, 5].

57 The Let-7 family of microRNAs (miRNAs) are well known for their key role in repressing  
58 naïve cellular states, controlling proliferation, and for maintaining cellular differentiation [6-9].  
59 Consistent with this role Let-7 depletion promotes stem cell fate in intestinal epithelial cells [10]  
60 while down-regulation of Let-7 miRNA levels (or compromised Let-7 activity) fuels CRC  
61 carcinogenesis [10-12], with similar pro-oncogenic effects in many other malignancies [13-17].  
62 Targets repressed by the Let-7 miRNA family are often part of proto-typical onco-fetal pathways  
63 that are frequently re-activated in a multitude of malignancies [8], including CRC [18, 19]. Such  
64 targets include *IGF2BP1*, *IGF2BP2*, *HMGA2*, *MYCN*, and a target we have recently  
65 characterized, *PLAGL2* [20]. We have previously documented the integral role of the Let-7  
66 target HMGA2 in driving tumorigenesis in mouse models of intestine-specific Let-7 depletion  
67 [10], although HMGA2 alone does not appear to drive stem cell fate in intestinal epithelial cells  
68 [10]. In contrast, we discovered that PLAGL2 clearly drives stem cell fate in intestinal organoids,  
69 and directly activates the key stem cell-specific transcription factor, ASCL2 [20]. ASCL2 is  
70 critical for establishing and maintaining intestinal stem cell fate [21, 22].

71 Previous studies have demonstrated some oncogenic roles for PLAGL2 in CRC cell  
72 lines, with some documented effects on features of cellular transformation, *in vitro* [23-27].  
73 Although these effects are hypothesized to be mediated via PLAGL2 enhancement of canonical  
74 Wnt signaling [23-27], the effects on Wnt signaling are often modest and the specific roles for  
75 such effects have not been determined. Studies in human CRC and glioma cells have revealed  
76 that PLAGL2 directly activates expression of *WNT6* [27, 28]. Despite this, effects on  
77 downstream Wnt signaling were not documented following manipulation of either PLAGL2 or  
78 WNT6 in CRC cell lines [27], whereas a clear effect was seen in neural stem cells [28]. This  
79 may reflect the commonplace ligand-independent hyperactivation of canonical Wnt signaling

80 that occurs in CRC, e.g. from mutations in *APC*, which likely obscures (or renders irrelevant)  
81 any effects of individual upstream Wnt ligands. Further insight into the relationship between  
82 *PLAGL2* and Wnt signaling was gained from experiments where we manipulated *PLAGL2* levels  
83 in intestinal organoids [20]. *PLAGL2* over-expression conferred Wnt-independent growth, but  
84 did not consistently augment Wnt signaling [20]. These results contrast the *PLAGL2* studies  
85 described above, which hypothesize an obligatory downstream role for Wnt signaling in the  
86 context of cellular transformation. In non-transformed cells (organoids) we did find that factors  
87 (perhaps Wnt ligands) secreted from *PLAGL2*-overexpressing organoids enhanced a Wnt  
88 reporter in co-cultured organoids [20]. Consistent with this, *PLAGL2* over-expression robustly  
89 activated expression of several Wnt ligands in organoids [20].

90 To investigate oncogenic mechanisms downstream of *PLAGL2* we examined the  
91 potential of *PLAGL2* to drive and maintain features of cellular transformation, and how such  
92 effects were mediated by direct *PLAGL2* target genes. We find that *PLAGL2* is a commonly up-  
93 regulated factor in CRC and has significant transforming properties. *PLAGL2* effects on *ASCL2*-  
94 mediated signaling appear much more robust than effects on Wnt signaling. Through a close  
95 examination of *TCF4*/ $\beta$ -Catenin target genes and a TOP-tdT Wnt reporter, we find that *PLAGL2*  
96 has minimal effects on canonical Wnt signaling. Consistent with these findings, over-expression  
97 of the *PLAGL2* target genes *ASCL2* and *IGF2* (but not constitutive activation of Wnt signaling)  
98 can rescue proliferation defects caused by *PLAGL2* inactivation.

99

## 100 RESULTS

101 We first examined expression of *PLAGL2* in matched colonic adenocarcinomas to  
102 compare expression between tumors and non-malignant tissue from the same individual.  
103 *PLAGL2* expression was usually undetectable in non-tumor tissue (Fig. 1A), whereas in tumor  
104 tissue *PLAGL2* was universally up-regulated (Fig. 1A). Consistent with this, analysis of TCGA  
105 RNA-seq data for colorectal cancer revealed the common and robust up-regulation of *PLAGL2*

106 in tumor tissue (Fig. 1B). Expression analysis in CRC cell lines revealed *PLAGL2* expression in  
107 all CRC cell lines tested, with robust expression in HEK293T cells (Fig. 1C). Further  
108 examination of TCGA data revealed that *PLAGL2* over-expression is a frequent feature of  
109 chromosomal instability (CIN) microsatellite-stable (MSS) tumors ( $P = 3.7e-17$ ), a class that  
110 makes up the majority (~80%) of CRCs. This is consistent with data from TCGA [29-31], where  
111 we find that the only mutations significantly associated with *PLAGL2* over-expression are *TP53*  
112 ( $P < 0.0001$ ) and *APC* ( $P < 0.01$ ) (Fig. 1D), which are hallmarks of CIN tumors [29]. This close  
113 association with *APC* loss could underlie observations that *PLAGL2* expression correlates with  
114  $\beta$ -Catenin levels in tumors [25]. As expected, *PLAGL2* up-regulation is rarely seen in tumors  
115 with mutations in *BRAF*, *ACVR2A*, *TGFBR2*, *MSH6*, or *MSH3* ( $P < 0.0001$ ), which are typical in  
116 MSI tumors [29].

117 To determine effects on disease outcomes, tumors were stratified for expression of  
118 *PLAGL2* using data from two CRC TCGA cohorts, and analyzed for overall survival. In both  
119 cohorts, high expression of *PLAGL2* in tumors predicted significantly reduced survival of CRC  
120 patients (Fig 1E, F). Thus, *PLAGL2* is commonly turned on in CRC tumors, with high-level  
121 expression likely driving more aggressive disease progression.

122 We previously generated *PLAGL2*-mutant DLD1 cell lines [20] using SRIRACCHA [32]  
123 and here we examined their proliferation via a co-expressed H2BGFP reporter, which easily  
124 enabled their enumeration. Each mutant clone exhibited significant deficits in proliferation  
125 compared to non-mutant DLD1 parent cells (Fig. 2A). While defined mutant clones generated  
126 with site-specific nucleases (such as CRISPR) can produce robust loss-of-function models, we  
127 also examined *PLAGL2* loss using CRISPR/Cas9 mutagenesis in a polyclonal population of  
128 mutant Caco2 and HT29 cells. Targeted cells were monitored using a transposon expressing a  
129 nuclear GFP reporter along with guide RNAs (gRNAs) against *PLAGL2* (Fig. 2B). This  
130 transposon was delivered to cells already stably expressing EspCas9. In both Caco2 (Fig. 2C)  
131 and HT29 (Fig. 2D) cells, proliferation was significantly reduced in cells expressing the *PLAGL2*-

132 specific gRNA. Lastly, shRNA knockdown of *PLAGL2* was pursued by a similar strategy with an  
133 shRNA-expressing transposon, along with a nuclear GFP reporter (Fig. 2E). DLD1 cell lines  
134 established with this transposon revealed several shRNAs that robustly depleted *PLAGL2*  
135 mRNA (Fig. 2F). In Caco2 cells expressing shRNA #3 and #4 (Fig. 2G), proliferation was  
136 significantly reduced, especially for shRNA #4 (Fig. 2H). Effects of *PLAGL2* knockdown were  
137 evaluated in the context of the FUCCI cell cycle reporter [33], delivered to cells using a  
138 transposon vector. In both Caco2 (Fig. 2I) and HT29 (Fig. 2J) cells, the FUCCI reporter revealed  
139 that *PLAGL2* knockdown decreased the number of cells in the S/G<sub>2</sub>/M phases of the cell cycle,  
140 but increased the number of cells in G<sub>0</sub>/G<sub>1</sub>. In sum, *PLAGL2* depletion in CRC cell lines  
141 compromises proliferation and cell cycle progression.

142 Migration, invasion, and the ability to survive anchorage-independent growth are salient  
143 hallmarks of transformed cells. In transwell assays we evaluated migration in the DLD1 mutant  
144 clones and found that migration is severely compromised in both mutants (Fig. 3A, D). Invasion  
145 through a layer of Matrigel was also remarkably reduced in DLD1 mutants, especially mutant #1  
146 (Fig. 3B, E, F). Knock-down of *PLAGL2* in Caco2 cells also reduced migration in transwell  
147 assays, especially for shRNA #4 (Fig. 3C). Lastly, *PLAGL2* was over-expressed in IEC6 cells to  
148 evaluate anchorage independent growth in soft agar. *PLAGL2* O/E consistently enabled the  
149 growth and formation of colonies (Fig. 3G, H), demonstrating that *PLAGL2* can confer  
150 resistance to anoikis-mediated cell death, a key property of transformed cells.

151 We next investigated the role of specific *PLAGL2* target genes. *IGF2* encodes a critical  
152 fetal growth factor that has been demonstrated to be a direct *PLAG1* and *PLAGL2* target gene  
153 [34-36], but its role downstream of *PLAGL2* in the context of cellular transformation has not  
154 been investigated. Here we find that *IGF2* expression is significantly reduced in *PLAGL2* mutant  
155 DLD1 clones (Fig. 4A) and following shRNA-mediated knockdown (Fig. 4B). In SW480 cells we  
156 performed SRIRACCHA-enriched mutagenesis of *PLAGL2* with CRISPR/Cas9, delivered via  
157 transposon vector. RNA was extracted from a mixed polyclonal population of *PLAGL2* mutants

158 for expression analysis, and mutagenesis of *PLAGL2* was confirmed by Illumina sequencing  
159 (Fig. S1). In this polyclonal population of *PLAGL2* mutants, *IGF2* expression was significantly  
160 reduced (Fig. 4C). In defined clonal mutants, generated using CRISPR/Cas9 (also delivered via  
161 transposon vector) in mouse organoids [20] *Igf2* expression was also significantly reduced.  
162 Thus, *PLAGL2* is required for expression of *IGF2* in both transformed and non-transformed  
163 intestinal epithelial cells. Over-expression of *PLAGL2* in mouse organoids [20] resulted in robust  
164 dose-dependent up-regulation of *Igf2* mRNA (Fig. 4E) and IGF2 protein (Fig. 4F). In sum,  
165 *PLAGL2* appears necessary and sufficient to drive *IGF2* expression. To gauge effects of IGF2  
166 alone, the human IGF2 cDNA was over-expressed in mouse intestinal enteroids via transposon  
167 transgenesis (Fig. 4G). IGF2 expression triggered organoid hyperplasia and the formation of  
168 large cysts (Fig. 4H, I), which phenocopies the cyst-like appearance of *PLAGL2*-overexpressing  
169 enteroids [20].

170 To investigate functional roles of *PLAGL2* target genes, the downstream effectors  
171 *ASCL2* and *IGF2* were further examined in tumors and transformed CRC cell lines. We  
172 examined CRC tumors from the TCGA for expression correlation between *PLAGL2* and *ASCL2*  
173 target genes (*ASCL2*, *KLHDC4*, *OLFM4*, *RNF43*, *LGR5*, *MYB*, *NR2E3*, *SMOC2*, *OSBPL5*, and  
174 *SOX9*). Nine out of ten *ASCL2* targets showed positive correlation with *PLAGL2* in all three  
175 TCGA CRC cohorts, while most targets were also positively correlated with *PLAGL2* in stomach  
176 adenocarcinoma and hepatocellular carcinoma tumors (Fig. 5A). Consistent with this, CRC cell  
177 lines stratified for the lowest vs. highest quintile of *PLAGL2* expression, as determined by  
178 previous RNA-seq studies [37], revealed that expression of *ASCL2* is significantly higher in  
179 *PLAGL2*-high CRC cell lines (Fig. 5B). SRIRACCHA-enriched mutagenesis of *PLAGL2* in  
180 SW480 cells (Fig. S1) also revealed depletion of *ASCL2* mRNA levels. This is all consistent with  
181 a role for *PLAGL2* in the direct transcriptional activation of *ASCL2*, as previously demonstrated  
182 in intestinal organoids and CRC cell lines [20]. However, to quantitatively gauge the impact on  
183 *ASCL2* activity in CRC cell lines we used the *ASCL2* reporter [38], adapted for transposon-

184 mediated expression of tdTomato (STAR-tdT, Fig. 5D). Co-transfection with shRNA vectors or  
185 an ASCL2 vector revealed robust activation by ASCL2 and modest reduction by shRNAs  
186 against *PLAGL2* (Fig. 5E). After establishing stable transgenic lines, shRNA knockdown of  
187 *PLAGL2* caused a pronounced reduction in STAR-tdT reporter activity in SW480, HT29, and  
188 Caco2 cells (Fig. 5F-H).

189 If ASCL2 and/or IGF2 are critical drivers downstream of *PLAGL2*, then we expect that  
190 their expression would rescue growth following *PLAGL2* loss-of-function. We first examined  
191 proliferation using the FUCCI reporter following knock-down of *PLAGL2* and rescue with ASCL2  
192 and/or IGF2. Only ASCL2 was able to restore cell cycle progression in Caco2 cells while neither  
193 IGF2 nor constitutively active  $\beta$ -Catenin (*CTNNB1*<sup>S33Y</sup>) expression was sufficient (Fig. 5I).  
194 Because of their expression of H2BGFP, DLD1 *PLAGL2* mutants could not be assessed using  
195 the FUCCI reporter. However, in *PLAGL2* DLD1 mutant line #1, ASCL2 and IGF2 individually  
196 augmented clone size following stable transfection, and when co-transfected together we  
197 observed synergistic effects between ASCL2 and IGF2 on growth in this *PLAGL2* mutant (Fig.  
198 5J), suggesting a role for both target genes. To examine a more diverse array of *PLAGL2*  
199 mutants, we performed SRIRACCHA-mediated mutagenesis [32] in Caco2 CRC cell lines while  
200 simultaneously providing PB-mediated transgenic expression of either IGF2 or ASCL2. If either  
201 IGF2 or ASCL2 is able to compensate for loss of *PLAGL2*, then we would expect increased  
202 survival and growth of clones with *PLAGL2* loss-of-function mutations if such clones also  
203 express exogenous IGF2 or ASCL2. Thus, a rescue would be evident in a higher proportion of  
204 *PLAGL2* mutants. Exogenous IGF2 expression does not result in a higher frequency of *PLAGL2*  
205 mutations, but surprisingly, ASCL2 expression results in a significantly lower frequency of  
206 *PLAGL2* mutations and higher proportion of non-coding mutations (Fig. 5K). In a 2-step  
207 experiment where lines were first established that already over-expressed ASCL2 or IGF2,  
208 *PLAGL2* mutagenesis was not tolerated in Caco2 cells already over-expressing ASCL2; i.e. no  
209 clones were recovered, unlike IGF2 over-expressing or vector controls. This suggests that any



210 oncogenic effects of ASCL2 depend on PLAGL2, and that these two factors may function as  
211 obligate partners.

212         Previous studies have reported that PLAGL2 augments Wnt signaling [23, 24, 27],  
213 perhaps via the transcriptional activation of Wnt ligand genes [28]. To explore effects of  
214 PLAGL2 on canonical Wnt signaling, we compared expression levels of *PLAGL2* mRNA with 36  
215 Wnt target genes among 7 cancer datasets from the TCGA (Fig. 6A). While some targets  
216 showed a positive correlation, many targets also showed anti-correlation with PLAGL2, and we  
217 observed no overall trend towards a positive association, except perhaps a slight positive  
218 correlation among liver hepatocellular carcinoma samples (Fig. 6B). In addition, an examination  
219 of fold changes of these Wnt targets in RNA-seq data from PLAGL2-expressing intestinal  
220 organoids showed no clear trend (Fig. 6C). In contrast, data sets directly manipulating Wnt  
221 signaling showed a clear decrease in Wnt target expression following  $\beta$ -Catenin knock-down or  
222 dnTCF4 expression, while stimulation of Wnt signaling in intestinal organoids (via GSK3 $\beta$   
223 inhibition) showed an induction of Wnt target gene expression (Fig. 6C). Canonical Wnt  
224 signaling is also frequently measured via heterologous reporters. We used our TOP-tdT reporter  
225 [20] to quantify Wnt signaling in the context of PLAGL2 knock-down. Co-transfection of dnTCF4  
226 dramatically reduced signal from this reporter, as expected (Fig. 6D). After establishing stable  
227 shRNA expression in the context of the TOP-tdT reporter, we observe a small decrease in  
228 normalized reporter signal in SW480 and Caco2 cells (Fig. 6E, F), but not in HT29 cells (Fig.  
229 6G). Representative images from Caco2 experiments confirm modest effects on TOP-tdT signal  
230 (Fig. 6H). Despite subtle effects in SW480 and Caco2 cells, no significant effects were observed  
231 on non-phosphorylated (“active”)  $\beta$ -Catenin or total  $\beta$ -Catenin protein levels in these cells (Fig.  
232 6I, J). In DLD1 *PLAGL2* mutant cell lines, similar effects were observed. Values were quantified  
233 from these immunoblot experiments (Fig. 6 K-M). Expression analysis of Wnt target genes also  
234 did not reveal any clear trend following *PLAGL2* knock-down (Fig. 6N-P). SRIRACCHA-  
235 mediated mutagenesis of *PLAGL2* in SW480 cells (Fig. S1) and RT-PCR revealed a slight trend

236 of reduced Wnt target gene expression, but only *ETS2* mRNA levels were significantly reduced  
237 (Fig. 6Q, R). In sum, the data only support a small effect of *PLAGL2* on Wnt signaling in CRC  
238 cells.

239

## 240 **DISCUSSION**

241 We find that *PLAGL2* is a transcriptional regulator of cellular transformation in colorectal  
242 cancer, being able to drive hallmark features, including unchecked proliferation, migration,  
243 invasion, and anchorage independent growth. The normal physiological role of *PLAGL2* is likely  
244 integral to a developmental pathway considering its high expression in the fetal intestinal  
245 anlagen and early postnatal intestine, but low expression in adult tissue [39]. *Plagl2*<sup>-/-</sup> mice  
246 demonstrate defects in intestinal epithelial differentiation and function, suggesting that *PLAGL2*  
247 plays a critical role during fetal intestinal development [39]. Similar to many other Let-7 targets,  
248 such as *HMGA2*, *PLAGL2* appears to exhibit typical features of an onco-fetal gene, considering  
249 its frequent re-activation in CRC and other malignancies [20, 28, 40-42]. However, there has  
250 been little insight into the role of direct transcriptional targets of *PLAGL2*, either during fetal  
251 development or carcinogenesis.

252 In possible oncogenic roles, *PLAGL2* has been shown to directly activate transcription of  
253 the thrombopoietin receptor (*MPL*) [43], which is a key receptor necessary for megakaryocyte  
254 and platelet formation [44]. *MPL* is also a proto-oncogene that can drive hematopoietic cell  
255 proliferation when it (or the truncated *v-mpl* oncogene) is over-expressed [45, 46]. Relevant to  
256 *PLAGL2*, *MPL* is implicated in driving transformation downstream of *PLAGL2* in acute myeloid  
257 leukemia (AML) [43], a malignancy in which increased expression of *MPL* marks a particularly  
258 aggressive subset [47]. However, even though *MPL* has been shown to be expressed on a  
259 subset of CRC cells that have metastatic tropism for the liver and lung [48, 49], *MPL* expression  
260 is not induced by *PLAGL2* in intestinal organoids [20] and *MPL* expression does not correlate  
261 with *PLAGL2* expression in CRC [29]. Thus, *MPL* may not be a relevant oncogenic *PLAGL2*

262 target gene in CRC. Other potential PLAGL2 targets, such as *NIP3* and *P73* [50, 51], appear to  
263 have tumor-suppressive properties, while another documented target, surfactant protein C  
264 (*SPC*) [52], has unknown relevance to tumorigenesis and/or cellular transformation.

265 We have previously identified *ASCL2* as a direct target gene of PLAGL2. *ASCL2* is a  
266 bHLH transcription factor that directly supports *LGR5* expression [22], drives IESC fate [21, 22,  
267 53], and promotes an aggressive phenotype in CRC [53-55]. Regarding this effect in CRC,  
268 *ASCL2* represses expression of *CDX2*, a transcription factor with a well-described role in  
269 positively driving intestinal epithelial differentiation [54]. *ASCL2* also represses expression of  
270 miR-200 miRNAs, which may underlie effects on a mesenchymal phenotype and/or EMT in  
271 cancer, which is repressed by the miR-200 family of miRNAs [55]. Studies have also suggested  
272 that *ASCL2* may play a role in augmenting the tumor-initiating capacity of CRC cells [56, 57],  
273 although this has not yet been carefully examined. Ultimately, the role of *ASCL2* may prove to  
274 be pleiotropic, as these studies suggest, with variable effects on differentiation, EMT, and tumor  
275 initiating potential.

276 Surprisingly, in our studies, *ASCL2* over-expression confers a survival disadvantage to  
277 *PLAGL2* mutants in the Caco2 cell line, even though we see that cell cycle progression is  
278 promoted by *ASCL2* rescue in the context of *PLAGL2* knock-down. Thus, *ASCL2* alone may  
279 have different effects than when co-expressed with *PLAGL2* at high levels; such effects of  
280 *ASCL2* may repress cellular transformation when *PLAGL2* levels are low. Previous studies  
281 seeking to identify *ASCL2* co-immunoprecipitating proteins included the identification of  
282 *PLAGL2*, as determined by mass spectrometry [38], although such direct interaction was not  
283 verified by other methods. If direct interaction can occur between these factors, then the effects  
284 we see on the STAR-tdT reporter in CRC cell lines could possibly reflect direct roles for  
285 *PLAGL2* on *ASCL2*-responsive regulatory elements. While follow-up studies are needed,  
286 *PLAGL2* and *ASCL2* may biochemically cooperate to drive specific oncogenic targets – targets

287 that may differ from those that are transcriptionally activated individually by each individual  
288 factor.

289 For effects on tumorigenesis, a gain-of-function role for ASCL2 (e.g. in the context of  
290 *ASCL2* up-regulation) is not clear. Modest entopic over-expression of *Ascl2*, at levels 2-3-fold  
291 higher than non-transgenic mice, via a BAC transgene, does not accelerate CRC tumorigenesis  
292 in the context of the *Apc<sup>Min</sup>* allele [58], a tumor model in which mice develop adenomatous  
293 polyps in the small intestine and colon. However, DNA replication (as measured by  
294 bromodeoxyuridine incorporation) is significantly elevated in the intestinal epithelium of these  
295 *Ascl2* transgenic mice, suggesting that elevated levels of ASCL2 can drive cell cycle  
296 progression [58]. Consistent with these *in vivo* findings, we observe accelerated cell cycle  
297 progression following ASCL2 over-expression in the context of PLAGL2 knock-down. In contrast  
298 to SW480 cells, which express very low levels of ASCL2 mRNA and protein, Caco2 cells  
299 express very high levels of ASCL2 [54]. Thus, ASCL2 may play a differential role downstream of  
300 PLAGL2, depending on the individual tumor or cancer cell line. In light of *in vivo* studies  
301 described above, *ASCL2* may only have cancer-promoting effects when *PLAGL2* is also  
302 coordinately up-regulated and/or activated. The co-expression of *PLAGL2* with *ASCL2* is  
303 striking in CRC [20], so the context for cooperation certainly exists in tumors.

304 The PLAGL2 paralog, PLAG1, is reported to transcriptionally activate the IGF2 promoter  
305 [34, 36], with over-expression experiments in NIH-3T3 and HEK293 cells suggesting that  
306 PLAGL2 may also positively regulate *IGF2* expression. IGF2 (a known driver of tumor  
307 progression) is over-expressed in ~15% of CRCs and also activates the PI3K-AKT pathway [59-  
308 65]. IGF2 up-regulation also occurs in the context of wild-type *PTEN*, *PIK3CA*, *BRAF*, and  
309 *KRAS* [29], suggesting that IGF2 over-expression can functionally substitute for common PI3K-  
310 AKT-activating mutations. Here we provide data in primary intestinal organoids and human CRC  
311 cell lines that PLAGL2 is necessary and sufficient to drive *IGF2* expression. Following knock-out  
312 or knock-down of *PLAGL2* in CRC cell lines, we observe that *IGF2* expression is depleted up to

313 95%, and in a CRC cell line such as Caco2, which is known to express very high levels of IGF2  
314 [66-68]), severe reduction of IGF2 has consequential effects on cellular growth. Evidence for  
315 this exists through studies of Caco2 cells, which are sensitive to both a neutralizing anti-IGF2  
316 antibody [66] and an IGF1R/INSR inhibitor [68], which blocks IGF2 or the receptors through  
317 which IGF2 signals, respectively. However, we cannot rescue cellular proliferation and/or  
318 survival following *PLAGL2* mutagenesis in Caco2 cells via over-expression of IGF2. Thus, the  
319 growth defects caused by *PLAGL2* loss are due to other effectors, besides IGF2. In *PLAGL2*  
320 mutant DLD1 cells *ASCL2* and IGF2 each alone have modest effects on clone proliferation, but  
321 cooperative/synergistic effects when co-expressed. Therefore, in some contexts these *PLAGL2*  
322 targets cooperate, whereas in other contexts, such as Caco2 cells, we do not see evidence of  
323 cooperation. Thus, the oncogenic dependency of *PLAGL2* on IGF2 and *ASCL2* is context-  
324 dependent, varying between tumors and/or tumor types.

325 Finally, our data suggest a minor role for Wnt signaling downstream of *PLAGL2* in CRC.  
326 While previous studies indicate that *WNT6* is a *PLAGL2* target gene [27, 28], and our previous  
327 studies show that *PLAGL2* activates the expression of Wnt genes (i.e. *Wnt9b*, *Wnt4*, *Wnt10a*,  
328 and *Wnt5a*) in primary intestinal epithelial cells [20], our studies here in CRC cell lines indicate  
329 that canonical Wnt signaling (via TCF4/ $\beta$ -Catenin) are only modestly affected by *PLAGL2*.  
330 Additionally, in available data from TCGA we find that *PLAGL2* levels do not correlate with a  
331 Wnt signature, as measured by the induction of Wnt target genes. If the effects of *PLAGL2* on  
332 Wnt signaling are routed via Wnt ligands (such as *WNT6*), then a minor effect on Wnt activation  
333 is not unexpected, since the vast majority of colorectal cancers possess mutations in either  
334 *APC*, *AXIN2*, or *CTNNB1* [29] — mutations that lead to ligand-independent Wnt pathway  
335 activation. Other *PLAGL2* target genes, besides Wnt ligands themselves, could be intracellular  
336 modifiers of the canonical Wnt signaling pathway. However, given the modest effects of  
337 *PLAGL2* on canonical Wnt signaling in CRC cells, the net effect of any such hypothetical targets  
338 is likely to be relatively small. This underscores the need to identify additional *PLAGL2* target

339 genes, especially those involved in fetal growth pathways and carcinogenesis; identifying such  
340 targets will help illuminate the onco-fetal pathways downstream of PLAGL2.

341

## 342 **Figure Legends**

343

344 **Figure 1. PLAGL2 is turned on in the majority of colorectal cancers and is predictive of**  
345 **overall survival. A)** PLAGL2 mRNA expression in 10 pairs of colon adenocarcinomas, with  
346 matched non-tumor adjacent tissue, as previously described [10]. **B)** PLAGL2 expression in  
347 non-tumor and colorectal adenocarcinoma tumors from the TCGA PanCancer Atlas cohort [69]  
348 **C)** RT-PCR assay quantifying relative levels of PLAGL2 mRNA in colorectal cancer cell lines  
349 and HEK293T cells. **D)** Oncoprint showing mutation and expression profiles of commonly  
350 mutated cancer genes, including PLAGL2, from the TCGA PanCancer Atlas of colorectal  
351 adenocarcinomas. **E)** Overall survival of CRC patients stratified for high expression of PLAGL2  
352 compared to all other tumors, based on microarray expression data [29]. **F)** Overall survival of  
353 CRC patients stratified for high expression of PLAGL2 compared to low expression based on  
354 microarray expression data (TCGA Provisional). Statistical significance was evaluated using  
355 Student's paired t-test (**A**), Student's one-tailed t-test (**B**), or a Mantel-Cox log-rank test (**E, F**).  
356

357 **Figure 2. Knock-down or knock-out of PLAGL2 compromises proliferation and cell cycle**  
358 **progression in CRC cell lines. A)** Proliferation of stable CRISPR-mutated PLAGL2 mutant  
359 DLD1 clones [20] compared to parental DLD1 cells. **B)** PB vector for stable expression of  
360 gRNAs and NLS-GFP, with Puro resistance. Caco2 (**C**) or HT29 (**D**) cell lines stably expressing  
361 EspCas9 were transfected with a PB vector expressing nuclear GFP and a non-specific (NS)  
362 gRNA or a gRNA against PLAGL2, and then growth was monitored. **E)** PB vector for stable  
363 expression of shRNAs and NLS-GFP, with Puro resistance. **F)** Knock-down (KD) of PLAGL2  
364 was assessed by RT-PCR in DLD1 cells (**F**) and also confirmed in Caco2 (**G**). **H)** Proliferation of

365 Caco2 cells stably transfected with PB vectors expressing nuclear GFP and non-specific (NS) or  
366 *PLAGL2*-specific shRNAs. Cell cycle status using the FUCCI [33] reporter co-transfected with a  
367 non-fluorescent shRNA PB vector was evaluated in Caco2 **(I)** and HT29 **(J)** CRC cells. For **A-D**,  
368 and **H** proliferation was quantified through enumeration of fluorescently labeled nuclei  
369 expressing NLS-GFP. Statistical significance (\* $p < 0.05$  or \*\* $p < 0.01$ ) was evaluated through an  
370 ordinary one-way ANOVA and Dunnett's multiple comparisons post-hoc test.

371

372 **Figure 3. PLAGL2 drives migration, invasion, and colony formation in soft agar.** Assays  
373 measuring migration **(A)** or invasion through Matrigel **(B)** of stable CRISPR-mutated *PLAGL2*  
374 mutant DLD1 clones [20] compared to parental DLD1. **C)** Migration assay of Caco2 cells stably  
375 transfected with PB vectors expressing nuclear GFP and a non-specific (NS) or a *PLAGL2*-  
376 specific shRNA. Images of GFP-expressing cells that have migrated through porous trans-well  
377 membranes 24 hours after plating for parental DLD1 cells **(D)**, DLD1 mutant clone #1 **(E)** or  
378 mutant clone #2 **(F)**. Soft agar colony forming assay for IEC6 cells transfected with a PB empty  
379 vector **(G)** or a PB vector expressing *PLAGL2* **(H)**. Statistical significance (\* $p < 0.05$  or \*\* $p < 0.01$ )  
380 was evaluated through an ordinary one-way ANOVA and Dunnett's multiple comparisons post-  
381 hoc test.

382

383 **Figure 4. PLAGL2 drives IGF2 expression in CRC cells and intestinal organoids and**  
384 **partially rescues growth phenotype in PLAGL2 mutant CRC cells.** **A)** RT-PCR for *IGF2* in  
385 DLD1 *PLAGL2* mutant clones. **B)** RT-PCR for *IGF2* in Caco2 cells following shRNA KD of  
386 *PLAGL2*. **C)** RT-PCR for *IGF2* following CRISPR/Cas mutagenesis using SRIRACCHA [32] and  
387 Hygromycin selection. **D)** RT-PCR for *Igf2* in *Plagl2* knockout mouse intestinal enteroids [20]  
388 compared to WT parental enteroids. **E)** RT-PCR for *Igf2* in 3 lines of mouse intestinal enteroids  
389 expressing low, medium, or high levels of human HA-tagged *PLAGL2* [20] compared to empty  
390 vector control enteroids. **F)** Immunoblot for HA-tag and IGF2 in low and high-expressing

391 PLAGL2 O/E enteroid lines. **G)** RT-PCR for IGF2 mRNA following O/E in enteroids. **H+I)** Cyst-  
392 like morphology in IGF2 O/E enteroids. For comparison of more than 2 conditions the statistical  
393 significance (\* $p < 0.05$  or \*\* $p < 0.01$ ) was evaluated through an ordinary one-way ANOVA and  
394 Dunnett's multiple comparisons post-hoc test. For pair-wise comparison, Welch's t-test was  
395 performed to determine statistical significance (\* $p < 0.05$  or \*\* $p < 0.01$ ).

396  
397 **Figure 5. PLAGL2 activates an ASCL2-dependent program in CRC cells. A)** Plots of  
398 correlation coefficients of linear regressions between *PLAGL2* and ten ASCL2 direct target  
399 genes (*ASCL2*, *KLHDC4*, *OLFM4*, *RNF43*, *LGR5*, *MYB*, *NR2E3*, *SMOC2*, *OSBPL5*, and *SOX9*)  
400 for seven TCGA datasets, including 3 from CRC adenocarcinoma (AdCA), 2 from stomach  
401 AdCA, and 2 from liver hepatocellular carcinoma (HCC). **B)** Colorectal cancer cell lines (N=154  
402 from [37]) were parsed into bottom and top quintiles for *PLAGL2* expression and then evaluated  
403 for *ASCL2* mRNA expression. **C)** EspCas9-mediated mutagenesis using SRIRACCHA [32] and  
404 gRNAs directed against LacZ or *PLAGL2*, followed by selection with hygromycin and RT-PCR  
405 for *ASCL2* mRNA. **D)** Depiction of the STAR ASCL2 reporter construct. **E)** Activity of the stem  
406 cell ASCL2 reporter (STAR-tdT) reporter [38] 48 hours after transfection in SW480 CRC cells  
407 that were also co-transfected along with vectors providing *PLAGL2* shRNA-mediated KD or  
408 ASCL2 O/E. As expected ASCL2 O/E augments STAR-tdT reporter activity. After selection with  
409 Puromycin for 6-8 days for stable *PLAGL2* shRNA expression STAR-tdT reporter activity  
410 (integral RFP fluorescence) was measured in SW480 (**F**), HT29 (**G**), and Caco2 (**H**) CRC cell  
411 lines. RFP levels were normalized to integral GFP fluorescence constitutively expressed by the  
412 PB shRNA vector. **I)** **FUCCI** analysis of cell cycling in Caco2 cells after shRNA mediated KD of  
413 *PLAGL2* and exogenous expression of *PLAGL2*, *ASCL2*, *IGF2*, *ASCL2* and *IGF2*, or a  
414 constitutively active  $\beta$ -catenin. **J)** Rescue of DLD1 *PLAGL2* mutant clone #1 with IGF2 and/or  
415 ASCL2 O/E and assessment of colony size following selection with G418. **K)** Mutation profile of  
416 *PLAGL2* targeted with SRIRACCHA using eSpCas9 with simultaneous over-expression of



417 ASCL2 or IGF2. For comparison of more than 2 conditions the statistical significance (\* $p < 0.05$   
418 or \*\* $p < 0.01$ ) was evaluated through an ordinary one-way ANOVA and Dunnett's multiple  
419 comparisons post-hoc test. For pair-wise comparison, Welch's t-test was performed to  
420 determine statistical significance (\* $p < 0.05$  or \*\* $p < 0.01$ ).

421

422 **Figure 6. Minimal effects on canonical Wnt signaling following inactivation of PLAGL2. A)**

423 Heatmap of correlation coefficients for linear regressions between *PLAGL2* and 36 TCF4/ $\beta$ -  
424 Catenin target genes for seven TCGA datasets, including 3 from CRC adenocarcinoma (AdCA),  
425 2 from stomach AdCA, and 2 from liver hepatocellular carcinoma (HCC). **B)** Dot/scatter plots of  
426 data from **(A)**. **C)** Violin plots of fold changes among 28 TCF4/ $\beta$ -Catenin target genes for  
427 conditions as follows: 1) between *PLAGL2*-low vs. *PLAGL2*-high CRC AdCA tumors (TCGA), 2)  
428 between control and KD of *CTNNB1* ( $\beta$ -Catenin) or inducible O/E of a dnTCF4 in LS174T CRC  
429 cell lines [70], and 3) GSK3 $\beta$  inhibition and Wnt/TCF4/ $\beta$ -Catenin activation in intestinal  
430 organoids following treatment with 5  $\mu$ M CHIR99021 [71]. **D)** Activity of the Wnt Super 8x  
431 TopFlash reporter [72] driving expression of tdT (TOP-tdT) 48 hours after transfection in SW480  
432 CRC cells that were also co-transfected along with vectors providing *PLAGL2* shRNA-mediated  
433 KD or dnTCF4 O/E. As expected, dnTCF4 O/E reduces signal from the TOP-tdT reporter and  
434 reduces the number of RFP-positive cells. After selection with Puromycin for 6-8 days for stable  
435 *PLAGL2* shRNA expression TOP-tdT reporter activity (integral RFP fluorescence) was  
436 measured in SW480 **(E)**, Caco2 **(F)**, and HT29 **(G)** CRC cell lines. RFP levels were normalized  
437 to integral GFP fluorescence constitutively expressed by the PB shRNA vector. **H)**  
438 Representative images of fluorescent Caco2 cells after 6 days of selection with 10  $\mu$ g/mL  
439 puromycin. Active (non-phosphorylated) and total  $\beta$ -Catenin levels were measured following  
440 *PLAGL2* KD in SW480 **(I)**, Caco2 **(J)**, and *PLAGL2* mutant DLD1 clones **(K)**. Protein levels were  
441 quantified and normalized to tubulin **(L-N)**. Direct TCF4/ $\beta$ -Catenin target gene expression levels  
442 were measured by RT-PCR in SW480 and Caco2 cells following *PLAGL2* KD **(O, P)**, in *PLAGL2*

443 mutant DLD1 clones (**Q**), and following SRIRACCHA mediated mutagenesis of *PLAGL2* in  
444 SW480 cells (**R**). Statistical significance (\* $p < 0.05$  or \*\* $p < 0.01$ ) was evaluated through an  
445 ordinary one-way ANOVA and Dunnett's multiple comparisons post-hoc test.

446  
447 **Figure S1. Indel and substitution mutations in SW480 cells around three target**  
448 **SRIRACCHA based CRISPR/Cas9 cleavage sites in *PLAGL2*. A)** Mutation distribution  
449 around cleavage sites in *PLAGL2* gene with NS gRNA, showing no events. **B)** Mutation  
450 distribution around the three target cleavage sites in *PLAGL2* **C)** Example allele profile of  
451 SRIRACCHA reads from these *PLAGL2* mutations. Note, the top hit represents unmodified  
452 *PLAGL2*.

453

## 454 MATERIALS AND METHODS

455

### 456 RT-PCR

457 CRC tumor samples, along with paired non-cancerous controls, were obtained from Siteman  
458 Cancer Center Tissue Procurement Core and were previously described [10]. RNA was  
459 extracted with TRIzol (ThermoFisher Scientific) and further purified using the RNeasy RNA  
460 Clean-up Kit (Qiagen) for these tumor samples. For cell lines or enteroids, RNA was prepared  
461 using TRIzol. RT reactions were performed with 3-4  $\mu\text{g}$  total RNA using oligo-dT and  
462 SuperScript III RT (ThermoFisher Scientific). QPCR was performed as previously described  
463 [20], and expression levels normalized to *PPIA* and *B2M* for human specimens or human cell  
464 lines. For RT-PCR using RNA from mouse organoids or cell lines expression levels were  
465 normalized to *Hprt* and *Tbp*.

466

### 467 TCGA Analysis

468 TCGA data was examined using the cBioPortal for Cancer Genomics [30, 31], hosted by the  
469 Center for Molecular Oncology at MSKCC. Oncoprint analysis (Fig. 1D) was performed for CRC  
470 AdCA tumors from the PanCan study [73]. Overall survival rates among CRC patients from the  
471 TCGA were determined from analysis of microarray data from two cohorts parsed for  
472 expression of *PLAGL2*. For one CRC dataset [29] *PLAGL2*-high tumors were those with greater  
473 than 3 SD above the mean for *PLAGL2* expression, while another CRC dataset (TCGA-  
474 provisional) *PLAGL2*-high tumors were defined as those with greater than 2 SD above the mean  
475 for *PLAGL2* expression and *PLAGL2*-low tumors were defined as those with more than 0.25 SD  
476 below the mean for *PLAGL2* expression.

477

#### 478 **PLAGL2 Mutagenesis with CRISPR/eSpCas9 and SRIRACCHA**

479 For expression of eSpCas9 [74], the ORF from eSpCas9 was amplified from eSpCas9(1.1),  
480 which was a gift from Feng Zhang (Addgene plasmid # 71814) and cloned into BII-ChBtW,  
481 which is identical to BII-ChPtW (which confers Puromycin resistance through PAC), but confers  
482 Blasticidin resistance. Using 8  $\mu$ L Lipofectamine 2000 (ThermoFisher Scientific) this vector, BII-  
483 ChBtW-eSpCas9, was introduced into Caco2 and HT29 cells by transfecting 1.6  $\mu$ g of  
484 transposon along with 400 ng of pCMV-hyPBBase [75], a generous gift from Dr. Allan Bradley  
485 (Wellcome Sanger Institute). Selection with 10  $\mu$ g/ml Blasticidin was initiated 48 hours after  
486 transfection and continued for 7 days, whereupon cells were expanded for transfection with BII-  
487 gR-PnGW. The BII-gR-PnGW vector contains a U6-driven gRNA cassette cloned from pX335,  
488 which was a gift from Feng Zhang (Addgene plasmid # 42335, [76]). This U6-driven gRNA  
489 module was cloned 5' of the CMV/hE1a promoter at a unique *Sfi*I site, and was modified to  
490 contain two *Bsm*BI sites for cloning gRNA oligos, in place of the existing *Bbs*I sites. The BII-gR-  
491 PnGW also constitutively expresses GFP-NLS for visualization of transduced cells.  
492 Transfections of the BII-gR-PnGW vector were performed in quadruplicate in 24-well plates 24  
493 hours after plating  $5 \times 10^4$  cells per well. Cells were transfected as above using 400 ng BII-gR-

494 PnGW and 100 ng pCMV-hyPBase, selected with 5  $\mu\text{g}/\text{mL}$  Puromycin for 4 days (HT29) or 10  
495  $\mu\text{g}/\text{mL}$  Puromycin for 10 days (Caco2). Fluorescence was measured starting 48 hours after  
496 transfection. A non-specific gRNA (GGAGACGCTGACCCGTCTCT) was used as a control for  
497 comparison with a PLAGL2-targeting gRNA (GTTACCGCAAGGACCATCTG) [20].  
498 SRIRACCHA-mediated mutagenesis was performed using the BII-gR-PtW-eSpCas9 vector,  
499 which contains a gRNA-expression cassette (as in BII-gR-PnGW) and confers resistance to  
500 Puromycin. SW480 ( $8 \times 10^5$  cells) or Caco2 ( $3 \times 10^5$  cell) were plated in triplicate or  
501 quadruplicate in 6-well plates 24 hours prior to transfection. For one-step transfection with  
502 SRIRACCHA components, 600 ng of the BII-gR-PtW-eSpCas9 vector with gRNAs specific for  
503 either PLAGL2 (GTTACCGCAAGGACCATCTG) or LacZ (GAAGGCGGCGGGCCATTACC)  
504 were transfected along with 600 ng of the BII-C3H target vector [32] containing target  
505 sequences either for PLAGL2 or LacZ cloned at the 3' end of the PAC ORF, 500 ng of pBS-PtH,  
506 and 300 ng of pCMV-hyPBase. SW480 cells were transfected using JetPrime (Polyplus Inc.) (2  
507  $\mu\text{L}/\mu\text{g}$  DNA) per manufacturer instructions while Caco2 cells were transfected using  
508 Lipofectamine 2000 (ThermoFisher Inc.) (4  $\mu\text{L}/\mu\text{g}$  DNA) per manufacturer instructions. Cells  
509 were selected with Puromycin for 5 days, then switched to Hygromycin selection for 10 days.  
510 RNA was then isolated using TRIzol or, alternatively, both RNA and DNA were isolated using  
511 the Allprep DNA/RNA Mini Kit (Qiagen Inc.). Mutation analysis was performed either on cDNA  
512 (SW480) or gRNA (Caco2). Mutation of *PLAGL2* was determined by amplicon sequencing on  
513 the Illumina platform by the Center for Genomic Sciences (Washington University) and analysis  
514 was performed using CRISPResso [77]. For transfection with SRIRACCHA components in  
515 rescue experiments, Caco2 cells were transfected in a one- or two-step manner. For the two-  
516 step method,  $3 \times 10^5$  cells in a 6-well plate that had been seeded the previous day were  
517 transfected with 800 ng BII-C3H-PLAGL2-T1 vector containing the PLAGL2 targeting gRNA  
518 sequence, 800 ng of either BII-ChBtW (empty vector), BII-ChBtW-ASCL2 (overexpressing  
519 *ASCL2*), or BII-ChBtW-IGF2 (overexpressing *IGF2*), and 400 of pCMV-hyPBase. Transfection

520 medium was removed in 24 hours and replaced with growth medium. Growth medium was  
521 changed in a further 24 hours for 10  $\mu\text{g}/\text{mL}$  Puromycin and 10  $\mu\text{g}/\text{mL}$  Blasticidin containing  
522 growth medium, and cells were selected for resistance for 8 days with regular media changes.  
523 Once cells reached confluency again, they were trypsinized and removed from the plate, and 3  
524  $\times 10^5$  cells were again seeded, this time into three identical wells of a 6-well plate. The following  
525 day, cells were transfected with 1,600 ng of the BII-gR-PtW-eSpCas9-PLAGL2-T1R vector, the  
526 Cas9 activity surrogate vector, 750 ng of the pBS-PtH vector, which contains the hygromycin  
527 resistance cassette, and 250 ng of pCMV-hyPBase. Transfection medium was removed and  
528 changed as before, and 48 hours post transfection medium containing 400  $\mu\text{g}/\text{mL}$  Hygromycin  
529 was added. Cells were selected for Hygromycin resistance for 13 days.

530 For the one-step method, 3  $\times 10^5$  cells seeded the previous day into a 6-well plate were  
531 transfected with 400 ng BII-C3H-PLAGL2-T1 vector containing the PLAGL2 targeting gRNA  
532 sequence, 400 ng of either BII-ChBtW (empty vector), BII-ChBtW-ASCL2 (overexpressing  
533 ASCL2), or BII-ChBtW-IGF2 (overexpressing *IGF2*), 500 ng of the BII-gR-PtW-eSpCas9-  
534 PLAGL2-T1R vector, 300 ng of the pBS-PtH vector, and 400 ng of the pCMV-hyPBase vector.  
535 Transfection medium was removed and changed again in 24 hours, and 48 hours post  
536 transfection cells were selected with 10  $\mu\text{g}/\text{mL}$  Puromycin and 10  $\mu\text{g}/\text{mL}$  Blasticidin for 5 days,  
537 before changing to medium containing 400  $\mu\text{g}/\text{mL}$  Hygromycin for 11 days.

538 For both methods, after Hygromycin selection was finished (cells reached confluency), gDNA  
539 was extracted and mutation of *PLAGL2* was again determined by amplicon sequencing on the  
540 Illumina platform by the Center for Genomic Sciences (Washington University) and subsequent  
541 analysis by CRISPResso.

542

543 **Cell Proliferation Assays**

544 Cellular proliferation was quantified by automated microscopy of GFP-positive cells on a Biotek  
545 Cytation3 using a 4x objective, where cell numbers were gauged by enumerating individual cells  
546 or by quantifying total integrated fluorescence per well. DLD1 *PLAGL2* mutants [20] express  
547 H2BGFP while other cell lines express nuclear GFP following stable transfection with BII-  
548 ShPnGW or BII-gR-PnGW. Cellular fluorescence was imaged every 1-2 days and media  
549 changed every 2-3 days.

550

### 551 **Cell Cycle Analysis with FUCCI Reporter**

552 A *Piggybac* version of the FUCCI reporter (BII-ChPtW-iresFUCCI) was constructed by PCR  
553 amplification of the Clover-Geminin-ires-mKO2-Cdt fragment from pLL3.7 (Addgene Plasmid  
554 #83841, [33]) and insertion into unique *BsmBI* sites within the *Piggybac* vector BII-ChPtW. The  
555 BII-ChPtW vector was constructed by insertion of the Woodchuck Hepatitis Virus (WHP)  
556 Posttranscriptional Regulatory Element (WPRE) downstream of the *BsmBI* site in the previously  
557 described BII-ChPt vector [20]. Transfections of the BII-ChPtW-iresFUCCI vector were  
558 performed in quadruplicate in 24-well plates 24 hours after plating  $5 \times 10^4$  cells per well. Cells  
559 were transfected as above using 400 ng of PB transposon and 100 ng pCMV-hyPBBase,  
560 selected with 5  $\mu\text{g}/\text{mL}$  Puromycin for 4 days (HT29) or 10  $\mu\text{g}/\text{mL}$  Puromycin for 10 days  
561 (Caco2).

562

### 563 **PLAGL2 shRNA-mediated Knockdown**

564 For protein knockdown, an shRNA expression *Piggybac* vector, BII-ShPnGW was constructed  
565 by insertion of a GFP-NLS cDNA into the *BsmBI* cloning sites of BII-ChPtW. A U6-driven shRNA  
566 module was then inserted at a unique *SfiI* site upstream of the CMV/hEfla promoter, with  
567 *BsmBI* cloning sites for insertion of unique shRNA double-stranded oligos. The BII-ShPiRW  
568 vector was constructed for FUCCI experiments. This vector is identical to BII-ShPnGW, but  
569 expresses the iRFP702 near-IR protein [78], which was first codon optimized, synthesized and

570 cloned from a gBlock fragment (IDT Inc.). Alternatively, for rescue experiments (Fig. 6), the  
571 shRNA module from BII-ShPnGW was cloned as an *Nsi*I-AgeI fragment into those unique  
572 restriction sites in BII-ChPtW-iresFUCCI to generate BII-Sh-FUCCI. The Broad Gene  
573 Perturbation Portal was queried for identification of candidate shRNAs against *PLAGL2*, and  
574 oligos prepared identical to the strategy employed for shRNA expression from the pLKO.1  
575 vector [79], except overhangs were modified for directional cloning into our BII-ShPnGW vector,  
576 with 5' overhangs ACCG and AAAA at the termini of each dsDNA oligo. The following four  
577 *PLAGL2*-specific target sequences were cloned in this manner: shRNA #1:  
578 TTCAGGCTCTAGGATCGATTC, shRNA #2: CCGTAGGACTTCAGGTATTAT, shRNA #3:  
579 TTGGATGACCTCTAGAGAAAT, shRNA #4: GCAGGAGAGAAGGCCTTTATT. A luciferase-  
580 specific shRNA was used as a control, with target sequence TCACAGAATCGTCGTATGCAG.  
581 The BII-ShPnGW vector with each specific shRNA was transfected into DLD1 cells in triplicate  
582 in 6-well plates, with 1.6  $\mu$ g of transposon transfected along with 400 ng of pCMV-hyPBase.  
583 Selection was initiated 48 hours after transfection using 10  $\mu$ g/mL Puromycin for Caco2 cells, or  
584 5  $\mu$ g/mL for other cell lines, and continued for 4-7 days. Cells were then cultured for 1-2 days in  
585 medium without Puromycin prior to harvesting RNA or protein for RT-PCR or immunoblot.

586

### 587 **Migration and Invasion Assays**

588 For migration assays  $1 \times 10^5$  cells were plated in 0.5 mL DMEM in Falcon Fluoroblok trans-well  
589 inserts containing 8  $\mu$ m pores, which were placed into Falcon 24-well plates, with each well  
590 containing 0.75 mL DMEM and 10% FBS. Plates were cultured 24 to 48 hours and then imaged  
591 for GFP fluorescence using the Biotek Cytation3. For invasion assays Falcon Fluoroblok trans-  
592 well inserts were coated with cold 25% Matrigel (75% DMEM), which was then solidified for one  
593 hour at 37°C. Cells were then added to transwell inserts and cultured and imaged as above for  
594 migration assays. DLD1 mutant clones (#1 and #2) and parental cells express H2BGFP for

595 visualization (Strubberg), while the shRNA knock-down vector (BII-ShPnGW) provided nuclear-  
596 localized GFP for enumeration of migratory cells by microscopy using the Biotek Cytation3.

597

### 598 **Soft Agar Colony Formation Assays**

599 IEC6 cells were cultured in Advanced-DMEM/F12 (ThermoFisher Inc.) containing 5% FBS,  
600 Glutamax (ThermoFisher Inc.), HEPES, N2 Supplement (ThermoFisher Inc.), Plasmocin  
601 (Invivogen Inc.), and Penicillin/Streptomycin. Over-expression vectors were prepared by cloning  
602 the PLAGL2 coding sequence into BII-ChBtW and IEC6 cells transfected in 6 well plates with  
603 1600 ng of this plasmid and 400 ng of pCMV-hyPBBase using Lipofectamine 2000  
604 (ThermoFisher Inc.). Cells were select 48 hours after transfection with medium containing 4  
605 µg/ml Blasticidin and selected for 5 days. To assay anoikis resistance and anchorage-  
606 independent proliferation IEC6 cells were grown in 0.35% low-melt agarose (Lonza SeaPlaque).  
607 A base layer of agarose was prepared by melting pre-sterilized 1.2% agarose in dH<sub>2</sub>O at 75°C,  
608 and cooling for 60 minutes at 42°C. This was then mixed with pre-heated 0.22 µm-filtered 2x  
609 DMEM containing 20% FBS, Sodium Bicarbonate, Sodium Pyruvate, Glutamax (ThermoFisher  
610 Inc.), HEPES, 2x N2 Supplement (ThermoFisher Inc.), Plasmocin (Invivogen Inc.), and  
611 Penicillin/Streptomycin. This mixture (1 mL) was applied to the bottom of an ultra-low  
612 attachment 6-well plate (Greiner Bio-One Inc.) and allowed to cool for 5 minutes at room  
613 temperature. Cells were detached with 0.05% Trypsin-EDTA and counted and placed on ice.  
614 Pre-sterilized 0.7% agarose was prepared as above, equilibrated for 60 minutes at 42°C, and  
615 mixed with pre-warmed growth medium, and then incubated 30 minutes at 37°C. Cells (8x10<sup>4</sup>)  
616 were added to 3.2 mL of this 0.35% agarose, mixed well, and then 1 mL overlaid onto each well  
617 containing a base layer of 0.6% agarose in 6-well plates. Plates were then incubated 20 minutes  
618 at room temperature and then placed into a 37°C incubator with 6% CO<sub>2</sub>. The next day 1 mL of  
619 complete culture medium was added. Colonies were counted 3 weeks following plating.

620



## 621 **Organoid Culture and Transfection**

622 Mouse small intestine organoids (enteroids) were generated from jejunum crypts from  
623 C57BL/6 mice (8-12 weeks) and cultured and transfected as previously described [20]. *Plagl2*  
624 mutant/KO and PLAGL2 over-expressing (O/E) mouse enteroids were previously described  
625 [20]. IGF2 O/E enteroids were generated by cloning the human IGF2 ORF into the BII-ChBtW  
626 vector via *BsmBI* sites, and transfection in mouse enteroids using 800 ng of this BII-ChBtW-  
627 IGF2 vector along with 200 ng of pCMV-hyPBBase. Enteroid transfections were performed as  
628 previously described [20]. Multiple (n=20-50) Blastocidin-resistance clones were obtained and  
629 pooled for stable propagation of a polyclonal line. IGF2 expression was assayed by RT-PCR  
630 and morphology documented using the Cytation3 microscopy platform and a 4x objective.

631

## 632 **ASCL2 and Wnt Reporter Assays**

633 The ASCL2 reporter was previously described [38]. Briefly, this reporter was adapted for  
634 *Piggybac* transposon-mediated gene delivery by cloning ASCL2 regulatory elements  
635 downstream of 2 polyadenylation signals (one synthetic and one from the SV40 TK gene) and  
636 upstream of a tandem tomato (tdT) fluorescent protein ORF and NLS signal, followed by the  
637 bovine growth hormone (bGH) polyadenylation signal, all flanked by HSIV core insulators from  
638 the chicken *HBBA* gene. For transfection, SW480 ( $2 \times 10^5$  cells), HT29 ( $2 \times 10^5$  cells), or Caco2  
639 ( $1 \times 10^5$  cells) were plated in triplicate or quadruplicate in 24-well plates 24 hours prior to  
640 transfection. Cells were transfected with 200 ng of BII-STAR-tdT, 200 ng of BII-ShPnGW, and  
641 100 ng of pCMV-hyPBBase. The BII-ShPnGW vector contained shRNA sequences directed  
642 against a non-specific target or the *PLAGL2* mRNA, as described above. For a positive control  
643 of reporter activity BII-STAR-tdT was co-transfected with 200 ng of BII-ChBtW-ASCL2 for  
644 ASCL2 O/E. Red fluorescence was quantified 48 hours after transfection using the Cytation3  
645 platform. Cells were then selected with Puromycin for 5 days and then both GFP and RFP  
646 fluorescence were quantified using the Cytation3. The BII-TOP-tdT reporter for the canonical

647 Wnt pathway was described previously [20], but was modified for nuclear expression with a C-  
648 terminal NLS. This vector was transfected and visualized in SW480, HT29, and Caco2 cells as  
649 described above for BII-STAR-tdT. For a positive control of this fluorescent Wnt reporter, BII-  
650 ChBtW-dnTCF4 was co-transfected with BII-TOP-tdT. This dominant negative TCF4 variant was  
651 described previously [80] and was modified here for expression via transposon. Red  
652 fluorescence was quantified 48 hours after transfection using the Cytation3 (Agilent-Biotek Inc.)  
653 platform and subsequently after antibiotic selection, as described above for the BII-STAR-tdT  
654 reporter.

655

### 656 **FUCCI Rescue Experiments**

657 For rescuing cell cycle effects caused by PLAGL2 knockdown the FUCCI vector was modified  
658 for simultaneous shRNA expression by cloning the *NsiI* – *Agel* fragment from BII-ShPnGW,  
659 which includes shRNA components, into BII-ChPtW-iresFUCCI to create the BII-shFUCCI  
660 vector. Caco2 were plated in quadruplicate for transfection with BII-shFUCCI along with BII-  
661 ChBtW vectors for O/E of PLAGL2, ASCL2, IGF2, or CTNNB1<sup>S33Y</sup>. The constitutively active  
662 beta-catenin mutant (CTNNB1<sup>S33Y</sup>) was described previously [81]. Beginning 48 hours after  
663 transfection cells were selected with Puromycin and Blastidicin for 5 days and then RFP and  
664 GFP fluorescence were quantified using the Cytation3.

665

### 666 **Immunoblots and Protein Quantification**

667 For analysis of active and total  $\beta$ -Catenin levels upon *PLAGL2* mRNA KD, Caco2 and SW480  
668 cells in a 6 well dish were transfected with the shRNA construct and selected as previously  
669 described, in triplicate. After the initial selection and subsequent expansion of cells to near  
670 confluency, cells were harvested and lysate was extracted using Cell Lysis Buffer (Cell  
671 Signaling Technology) according to manufacturer's specifications. Briefly, a 1X concentration of  
672 this buffer was made with the addition of 2X protease inhibitor cocktail (Millipore Sigma), 1 mM

673 sodium fluoride, 1 mM sodium pyrophosphate, and 5 mM activated sodium orthovanadate.  
674 Cells were rinsed in 1x PBS in the plate, and 500  $\mu$ L of the lysis buffer was added. The plate  
675 was incubated on ice for 5 minutes. The cells and buffer were then removed to a 1.7 mL  
676 microcentrifuge tube and sonicated for 10 seconds. Tubes were centrifuged at 14,000 x g for  
677 10 minutes, and supernatant was removed to a separate tube. Protein concentration was  
678 determined using a microplate and BCA assay kit (ThermoFisher) as per manufacturer's  
679 specifications. Equal amounts of protein (nominally 50  $\mu$ g) from each sample were separated  
680 on 4-20% gradient Bis-Tris SDS-PAGE gels (GenScript), and protein was then electroblotted  
681 onto low autofluorescence PVDF membrane (Bio-Rad). The membrane was blocked in 1X PBS  
682 + 5% BSA (Millipore Sigma), and probed overnight with primary rabbit antibodies raised against  
683 total or active  $\beta$ -Catenin (Cell Signaling Technology), and primary mouse antibodies raised  
684 against  $\alpha$ -tubulin (Santa Cruz Biotechnology) as a loading control. The next day, the primary  
685 antibodies were washed off and the blot was incubated with anti-mouse DyLight 680 conjugated  
686 and anti-rabbit DyLight 800 conjugated secondary antibodies for an hour. The secondary  
687 antibodies were washed off and signal was captured using the LiCor Odyssey CLx Near-  
688 Infrared Imaging System, using the 800 channel to capture  $\beta$ -Catenin signal and the 700  
689 channel to capture  $\alpha$ -tubulin signal. Quantitation of signal was performed using ImageStudio  
690 Lite (LiCor), using the software's "average" method of background subtraction.  $\beta$ -Catenin signal  
691 was normalized using  $\alpha$ -tubulin signal, and average normalized  $\beta$ -Catenin signal, standard  
692 deviation, and statistical significance were calculated and plotted using GraphPad Prism 8.

693  
694 **REFERENCES**

- 695  
696 1. MacDonald BT, Tamai K, He X. Wnt/beta-catenin signaling: components, mechanisms,  
697 and diseases. *Dev Cell*. 2009;17(1):9-26. Epub 2009/07/22. doi: S1534-5807(09)00257-3 [pii]  
698 10.1016/j.devcel.2009.06.016. PubMed PMID: 19619488.

- 699 2. Kinzler KW, Nilbert MC, Su LK, Vogelstein B, Bryan TM, Levy DB, et al. Identification of  
700 FAP locus genes from chromosome 5q21. *Science*. 1991;253(5020):661-5. Epub 1991/08/09.  
701 doi: 10.1126/science.1651562. PubMed PMID: 1651562.
- 702 3. Seshagiri S, Stawiski EW, Durinck S, Modrusan Z, Storm EE, Conboy CB, et al.  
703 Recurrent R-spondin fusions in colon cancer. *Nature*. 2012;488(7413):660-4. doi:  
704 10.1038/nature11282. PubMed PMID: 22895193; PubMed Central PMCID: PMC3690621.
- 705 4. Ben-Porath I, Thomson MW, Carey VJ, Ge R, Bell GW, Regev A, et al. An embryonic  
706 stem cell-like gene expression signature in poorly differentiated aggressive human tumors. *Nat*  
707 *Genet*. 2008;40(5):499-507. doi: 10.1038/ng.127. PubMed PMID: 18443585; PubMed Central  
708 PMCID: PMC2912221.
- 709 5. Merlos-Suarez A, Barriga FM, Jung P, Iglesias M, Cespedes MV, Rossell D, et al. The  
710 intestinal stem cell signature identifies colorectal cancer stem cells and predicts disease  
711 relapse. *Cell Stem Cell*. 2011;8(5):511-24. doi: 10.1016/j.stem.2011.02.020. PubMed PMID:  
712 21419747.
- 713 6. Johnson CD, Esquela-Kerscher A, Stefani G, Byrom M, Kelnar K, Ovcharenko D, et al.  
714 The let-7 microRNA represses cell proliferation pathways in human cells. *Cancer Res*.  
715 2007;67(16):7713-22. Epub 2007/08/19. doi: 67/16/7713 [pii]  
716 10.1158/0008-5472.CAN-07-1083. PubMed PMID: 17699775.
- 717 7. Gurtan AM, Ravi A, Rahl PB, Bosson AD, JnBaptiste CK, Bhutkar A, et al. Let-7  
718 represses Nr6a1 and a mid-gestation developmental program in adult fibroblasts. *Genes Dev*.  
719 2013;27(8):941-54. doi: 10.1101/gad.215376.113. PubMed PMID: 23630078; PubMed Central  
720 PMCID: PMC3650230.
- 721 8. Boyerinas B, Park SM, Shomron N, Hedegaard MM, Vinther J, Andersen JS, et al.  
722 Identification of let-7-regulated oncofetal genes. *Cancer Res*. 2008;68(8):2587-91. Epub  
723 2008/04/17. doi: 68/8/2587 [pii]  
724 10.1158/0008-5472.CAN-08-0264. PubMed PMID: 18413726.

- 725 9. Boyerinas B, Park SM, Hau A, Murmann AE, Peter ME. The role of let-7 in cell  
726 differentiation and cancer. *Endocr Relat Cancer*. 2010;17(1):F19-36. doi: 10.1677/ERC-09-  
727 0184. PubMed PMID: 19779035.
- 728 10. Madison BB, Jeganathan AN, Mizuno R, Winslow MM, Castells A, Cuatrecasas M, et al.  
729 Let-7 Represses Carcinogenesis and a Stem Cell Phenotype in the Intestine via Regulation of  
730 Hmga2. *PLoS Genet*. 2015;11(8):e1005408. doi: 10.1371/journal.pgen.1005408. PubMed  
731 PMID: 26244988; PubMed Central PMCID: PMC4526516.
- 732 11. King CE, Wang L, Winograd R, Madison BB, Mongroo PS, Johnstone CN, et al. LIN28B  
733 fosters colon cancer migration, invasion and transformation through let-7-dependent and -  
734 independent mechanisms. *Oncogene*. 2011;30(40):4185-93. Epub 2011/06/01. doi:  
735 10.1038/onc.2011.131. PubMed PMID: 21625210; PubMed Central PMCID: PMC3165068.
- 736 12. Madison BB, Liu Q, Zhong X, Hahn CM, Lin N, Emmett MJ, et al. LIN28B promotes  
737 growth and tumorigenesis of the intestinal epithelium via Let-7. *Genes Dev*. 2013;27(20):2233-  
738 45. doi: 10.1101/gad.224659.113. PubMed PMID: 24142874; PubMed Central PMCID:  
739 PMC3814644.
- 740 13. Kumar MS, Erkeland SJ, Pester RE, Chen CY, Ebert MS, Sharp PA, et al. Suppression  
741 of non-small cell lung tumor development by the let-7 microRNA family. *Proc Natl Acad Sci U S*  
742 *A*. 2008;105(10):3903-8. Epub 2008/03/01. doi: 0712321105 [pii]  
743 10.1073/pnas.0712321105. PubMed PMID: 18308936.
- 744 14. Yu F, Yao H, Zhu P, Zhang X, Pan Q, Gong C, et al. let-7 regulates self renewal and  
745 tumorigenicity of breast cancer cells. *Cell*. 2007;131(6):1109-23. doi: 10.1016/j.cell.2007.10.054.  
746 PubMed PMID: 18083101.
- 747 15. Ricarte-Filho JC, Fuziwara CS, Yamashita AS, Rezende E, da-Silva MJ, Kimura ET.  
748 Effects of let-7 microRNA on Cell Growth and Differentiation of Papillary Thyroid Cancer. *Transl*  
749 *Oncol*. 2009;2(4):236-41. Epub 2009/12/04. PubMed PMID: 19956384.

- 750 16. Nadiminty N, Tummala R, Lou W, Zhu Y, Shi XB, Zou JX, et al. MicroRNA let-7c is  
751 downregulated in prostate cancer and suppresses prostate cancer growth. PLoS One.  
752 2012;7(3):e32832. Epub 2012/04/06. doi: 10.1371/journal.pone.0032832. PubMed PMID:  
753 22479342; PubMed Central PMCID: PMC3316551.
- 754 17. Qian P, Zuo Z, Wu Z, Meng X, Li G, Wu Z, et al. Pivotal role of reduced let-7g  
755 expression in breast cancer invasion and metastasis. Cancer Res. 2011;71(20):6463-74. doi:  
756 10.1158/0008-5472.CAN-11-1322. PubMed PMID: 21868760.
- 757 18. Ye S, Song W, Xu X, Zhao X, Yang L. IGF2BP2 promotes colorectal cancer cell  
758 proliferation and survival through interfering with RAF-1 degradation by miR-195. FEBS Lett.  
759 2016;590(11):1641-50. doi: 10.1002/1873-3468.12205. PubMed PMID: 27153315.
- 760 19. Wang X, Liu X, Li AY, Chen L, Lai L, Lin HH, et al. Overexpression of HMGA2 promotes  
761 metastasis and impacts survival of colorectal cancers. Clin Cancer Res. 2011;17(8):2570-80.  
762 doi: 10.1158/1078-0432.CCR-10-2542. PubMed PMID: 21252160; PubMed Central PMCID:  
763 PMC3079060.
- 764 20. Strubberg AS, Veronese-Paniagua DA, Zhao TT, L. D, Pritchard T, Bayguinov P, et al.  
765 The Zinc Finger Transcription Factor PLAGL2 Enhances Stem Cell Fate and Activates  
766 Expression of ASCL2 in Intestinal Epithelial Cells. Stem cell reports. 2018.
- 767 21. van der Flier LG, van Gijn ME, Hatzis P, Kujala P, Haegebarth A, Stange DE, et al.  
768 Transcription factor achaete scute-like 2 controls intestinal stem cell fate. Cell. 2009;136(5):903-  
769 12. Epub 2009/03/10. doi: S0092-8674(09)00079-8 [pii]  
770 10.1016/j.cell.2009.01.031. PubMed PMID: 19269367.
- 771 22. Schuijers J, Junker JP, Mokry M, Hatzis P, Koo BK, Sasselli V, et al. Ascl2 acts as an R-  
772 spondin/Wnt-responsive switch to control stemness in intestinal crypts. Cell Stem Cell.  
773 2015;16(2):158-70. doi: 10.1016/j.stem.2014.12.006. PubMed PMID: 25620640.
- 774 23. Wang YP, Guo PT, Zhu Z, Zhang H, Xu Y, Chen YZ, et al. Pleomorphic adenoma gene  
775 like-2 induces epithelial-mesenchymal transition via Wnt/beta-catenin signaling pathway in

- 776 human colorectal adenocarcinoma. *Oncol Rep.* 2017. doi: 10.3892/or.2017.5485. PubMed  
777 PMID: 28259923.
- 778 24. Zhou J, Liu H, Zhang L, Liu X, Zhang C, Wang Y, et al. DJ-1 promotes colorectal cancer  
779 progression through activating PLAGL2/Wnt/BMP4 axis. *Cell Death Dis.* 2018;9(9):865. Epub  
780 2018/08/31. doi: 10.1038/s41419-018-0883-4. PubMed PMID: 30158634; PubMed Central  
781 PMCID: PMC6115399.
- 782 25. Liu X, Chen X, Zeng K, Xu M, He B, Pan Y, et al. DNA-methylation-mediated silencing of  
783 miR-486-5p promotes colorectal cancer proliferation and migration through activation of  
784 PLAGL2/IGF2/beta-catenin signal pathways. *Cell Death Dis.* 2018;9(10):1037. Epub  
785 2018/10/12. doi: 10.1038/s41419-018-1105-9. PubMed PMID: 30305607; PubMed Central  
786 PMCID: PMC6180105.
- 787 26. Li D, Lin C, Li N, Du Y, Yang C, Bai Y, et al. PLAGL2 and POFUT1 are regulated by an  
788 evolutionarily conserved bidirectional promoter and are collaboratively involved in colorectal  
789 cancer by maintaining stemness. *EBioMedicine.* 2019;45:124-38. Epub 2019/07/08. doi:  
790 10.1016/j.ebiom.2019.06.051. PubMed PMID: 31279780; PubMed Central PMCID:  
791 PMC6642334.
- 792 27. Li N, Li D, Du Y, Su C, Yang C, Lin C, et al. Overexpressed PLAGL2 transcriptionally  
793 activates Wnt6 and promotes cancer development in colorectal cancer. *Oncol Rep.*  
794 2019;41(2):875-84. Epub 2018/12/12. doi: 10.3892/or.2018.6914. PubMed PMID: 30535429;  
795 PubMed Central PMCID: PMC6313070.
- 796 28. Zheng H, Ying H, Wiedemeyer R, Yan H, Quayle SN, Ivanova EV, et al. PLAGL2  
797 regulates Wnt signaling to impede differentiation in neural stem cells and gliomas. *Cancer Cell.*  
798 2010;17(5):497-509. doi: 10.1016/j.ccr.2010.03.020. PubMed PMID: 20478531; PubMed  
799 Central PMCID: PMC2900858.

- 800 29. Cancer Genome Atlas N. Comprehensive molecular characterization of human colon  
801 and rectal cancer. *Nature*. 2012;487(7407):330-7. doi: 10.1038/nature11252. PubMed PMID:  
802 22810696; PubMed Central PMCID: PMC3401966.
- 803 30. Cerami E, Gao J, Dogrusoz U, Gross BE, Sumer SO, Aksoy BA, et al. The cBio cancer  
804 genomics portal: an open platform for exploring multidimensional cancer genomics data. *Cancer*  
805 *discovery*. 2012;2(5):401-4. doi: 10.1158/2159-8290.CD-12-0095. PubMed PMID: 22588877;  
806 PubMed Central PMCID: PMC3956037.
- 807 31. Gao J, Aksoy BA, Dogrusoz U, Dresdner G, Gross B, Sumer SO, et al. Integrative  
808 analysis of complex cancer genomics and clinical profiles using the cBioPortal. *Sci Signal*.  
809 2013;6(269):pl1. doi: 10.1126/scisignal.2004088. PubMed PMID: 23550210; PubMed Central  
810 PMCID: PMC4160307.
- 811 32. Wen Y, Liao G, Pritchard T, Zhao TT, Connelly JP, Pruett-Miller SM, et al. A Stable but  
812 Reversible Integrated Surrogate Reporter for Assaying CRISPR/Cas9-Stimulated Homology-  
813 directed Repair. *J Biol Chem*. 2017. doi: 10.1074/jbc.M117.777722. PubMed PMID: 28228480.
- 814 33. Bajar BT, Lam AJ, Badiie RK, Oh YH, Chu J, Zhou XX, et al. Fluorescent indicators for  
815 simultaneous reporting of all four cell cycle phases. *Nat Methods*. 2016;13(12):993-6. Epub  
816 2016/11/01. doi: 10.1038/nmeth.4045. PubMed PMID: 27798610; PubMed Central PMCID:  
817 PMC5548384.
- 818 34. Akhtar M, Holmgren C, Gondor A, Vesterlund M, Kanduri C, Larsson C, et al. Cell type  
819 and context-specific function of PLAG1 for IGF2 P3 promoter activity. *Int J Oncol*.  
820 2012;41(6):1959-66. doi: 10.3892/ijo.2012.1641. PubMed PMID: 23023303; PubMed Central  
821 PMCID: PMC3583874.
- 822 35. Hensen K, Van Valckenborgh IC, Kas K, Van de Ven WJ, Voz ML. The tumorigenic  
823 diversity of the three PLAG family members is associated with different DNA binding capacities.  
824 *Cancer Res*. 2002;62(5):1510-7. PubMed PMID: 11888928.



- 825 36. Voz ML, Agten NS, Van de Ven WJ, Kas K. PLAG1, the main translocation target in  
826 pleomorphic adenoma of the salivary glands, is a positive regulator of IGF-II. *Cancer Res.*  
827 2000;60(1):106-13. PubMed PMID: 10646861.
- 828 37. Medico E, Russo M, Picco G, Cancelliere C, Valtorta E, Corti G, et al. The molecular  
829 landscape of colorectal cancer cell lines unveils clinically actionable kinase targets. *Nat*  
830 *Commun.* 2015;6:7002. doi: 10.1038/ncomms8002. PubMed PMID: 25926053.
- 831 38. Oost KC, van Voorthuisen L, Fumagalli A, Lindeboom RGH, Sprangers J, Omerzu M, et  
832 al. Specific Labeling of Stem Cell Activity in Human Colorectal Organoids Using an ASCL2-  
833 Responsive Minigene. *Cell Rep.* 2018;22(6):1600-14. doi: 10.1016/j.celrep.2018.01.033.  
834 PubMed PMID: 29425513; PubMed Central PMCID: PMC5847189.
- 835 39. Van Dyck F, Braem CV, Chen Z, Declercq J, Deckers R, Kim BM, et al. Loss of the  
836 PlagL2 transcription factor affects lacteal uptake of chylomicrons. *Cell metabolism.*  
837 2007;6(5):406-13. doi: 10.1016/j.cmet.2007.09.010. PubMed PMID: 17983586.
- 838 40. Landrette SF, Kuo YH, Hensen K, Barjesteh van Waalwijk van Doorn-Khosrovani S,  
839 Perrat PN, Van de Ven WJ, et al. Plag1 and Plagl2 are oncogenes that induce acute myeloid  
840 leukemia in cooperation with Cbfb-MYH11. *Blood.* 2005;105(7):2900-7. doi: 10.1182/blood-  
841 2004-09-3630. PubMed PMID: 15585652.
- 842 41. Liu B, Lu C, Song YX, Gao P, Sun JX, Chen XW, et al. The role of pleomorphic  
843 adenoma gene-like 2 in gastrointestinal cancer development, progression, and prognosis.  
844 *International journal of clinical and experimental pathology.* 2014;7(6):3089-100. PubMed PMID:  
845 25031728; PubMed Central PMCID: PMC4097215.
- 846 42. Guo J, Wang M, Wang Z, Liu X. Overexpression of Pleomorphic Adenoma Gene-Like 2  
847 Is a Novel Poor Prognostic Marker of Prostate Cancer. *PLoS One.* 2016;11(8):e0158667. doi:  
848 10.1371/journal.pone.0158667. PubMed PMID: 27537362; PubMed Central PMCID:  
849 PMCPMC4990332.

- 850 43. Landrette SF, Madera D, He F, Castilla LH. The transcription factor PlagL2 activates Mpl  
851 transcription and signaling in hematopoietic progenitor and leukemia cells. *Leukemia*.  
852 2011;25(4):655-62. doi: 10.1038/leu.2010.301. PubMed PMID: 21263445; PubMed Central  
853 PMCID: PMC3076538.
- 854 44. de Sauvage FJ, Hass PE, Spencer SD, Malloy BE, Gurney AL, Spencer SA, et al.  
855 Stimulation of megakaryocytopoiesis and thrombopoiesis by the c-Mpl ligand. *Nature*.  
856 1994;369(6481):533-8. doi: 10.1038/369533a0. PubMed PMID: 8202154.
- 857 45. Souyri M, Vigon I, Penciolelli JF, Heard JM, Tambourin P, Wendling F. A putative  
858 truncated cytokine receptor gene transduced by the myeloproliferative leukemia virus  
859 immortalizes hematopoietic progenitors. *Cell*. 1990;63(6):1137-47. doi: 10.1016/0092-  
860 8674(90)90410-g. PubMed PMID: 2175677.
- 861 46. Skoda RC, Seldin DC, Chiang MK, Peichel CL, Vogt TF, Leder P. Murine c-mpl: a  
862 member of the hematopoietic growth factor receptor superfamily that transduces a proliferative  
863 signal. *EMBO J*. 1993;12(7):2645-53. PubMed PMID: 8334987; PubMed Central PMCID:  
864 PMCPMC413511.
- 865 47. Vigon I, Dreyfus F, Melle J, Viguie F, Ribrag V, Cocault L, et al. Expression of the c-mpl  
866 proto-oncogene in human hematologic malignancies. *Blood*. 1993;82(3):877-83. PubMed PMID:  
867 8393355.
- 868 48. Gao W, Chen L, Ma Z, Du Z, Zhao Z, Hu Z, et al. Isolation and phenotypic  
869 characterization of colorectal cancer stem cells with organ-specific metastatic potential.  
870 *Gastroenterology*. 2013;145(3):636-46 e5. doi: 10.1053/j.gastro.2013.05.049. PubMed PMID:  
871 23747337.
- 872 49. Wu Z, Wei D, Gao W, Xu Y, Hu Z, Ma Z, et al. TPO-Induced Metabolic Reprogramming  
873 Drives Liver Metastasis of Colorectal Cancer CD110+ Tumor-Initiating Cells. *Cell Stem Cell*.  
874 2015;17(1):47-59. doi: 10.1016/j.stem.2015.05.016. PubMed PMID: 26140605.

- 875 50. Mizutani A, Furukawa T, Adachi Y, Ikehara S, Taketani S. A zinc-finger protein,  
876 PLAGL2, induces the expression of a proapoptotic protein Nip3, leading to cellular apoptosis. *J*  
877 *Biol Chem.* 2002;277(18):15851-8. doi: 10.1074/jbc.M111431200. PubMed PMID: 11832486.
- 878 51. Hanks TS, Gauss KA. Pleomorphic adenoma gene-like 2 regulates expression of the  
879 p53 family member, p73, and induces cell cycle block and apoptosis in human promonocytic  
880 U937 cells. *Apoptosis.* 2012;17(3):236-47. doi: 10.1007/s10495-011-0672-3. PubMed PMID:  
881 22076304.
- 882 52. Guo Y, Yang MC, Weissler JC, Yang YS. PLAGL2 translocation and SP-C promoter  
883 activity--a cellular response of lung cells to hypoxia. *Biochem Biophys Res Commun.*  
884 2007;360(3):659-65. doi: 10.1016/j.bbrc.2007.06.106. PubMed PMID: 17618602; PubMed  
885 Central PMCID: PMCPMC2084061.
- 886 53. Giakountis A, Moulos P, Zarkou V, Oikonomou C, Harokopos V, Hatzigeorgiou AG, et al.  
887 A Positive Regulatory Loop between a Wnt-Regulated Non-coding RNA and ASCL2 Controls  
888 Intestinal Stem Cell Fate. *Cell Rep.* 2016;15(12):2588-96. doi: 10.1016/j.celrep.2016.05.038.  
889 PubMed PMID: 27292638.
- 890 54. Shang Y, Pan Q, Chen L, Ye J, Zhong X, Li X, et al. Achaete scute-like 2 suppresses  
891 CDX2 expression and inhibits intestinal neoplastic epithelial cell differentiation. *Oncotarget.*  
892 2015;6(31):30993-1006. doi: 10.18632/oncotarget.5206. PubMed PMID: 26307678; PubMed  
893 Central PMCID: PMC4741583.
- 894 55. Tian Y, Pan Q, Shang Y, Zhu R, Ye J, Liu Y, et al. MicroRNA-200 (miR-200) cluster  
895 regulation by achaete scute-like 2 (Ascl2): impact on the epithelial-mesenchymal transition in  
896 colon cancer cells. *J Biol Chem.* 2014;289(52):36101-15. doi: 10.1074/jbc.M114.598383.  
897 PubMed PMID: 25371200; PubMed Central PMCID: PMC4276874.
- 898 56. Ye J, Liu S, Shang Y, Chen H, Wang R. R-spondin1/Wnt-enhanced Ascl2 autoregulation  
899 controls the self-renewal of colorectal cancer progenitor cells. *Cell Cycle.* 2018;17(8):1014-25.

- 900 doi: 10.1080/15384101.2018.1469874. PubMed PMID: 29886802; PubMed Central PMCID:  
901 PMC6103697.
- 902 57. Wei X, Ye J, Shang Y, Chen H, Liu S, Liu L, et al. Ascl2 activation by YAP1/KLF5  
903 ensures the self-renewability of colon cancer progenitor cells. *Oncotarget*. 2017;8(65):109301-  
904 18. doi: 10.18632/oncotarget.22673. PubMed PMID: 29312609; PubMed Central PMCID:  
905 PMC5752522.
- 906 58. Reed KR, Tunster SJ, Young M, Carrico A, John RM, Clarke AR. Entopic  
907 overexpression of Ascl2 does not accelerate tumorigenesis in ApcMin mice. *Gut*.  
908 2012;61(10):1435-8. doi: 10.1136/gutjnl-2011-300842. PubMed PMID: 22138533.
- 909 59. Cui H, Cruz-Correa M, Giardiello FM, Hutcheon DF, Kafonek DR, Brandenburg S, et al.  
910 Loss of IGF2 imprinting: a potential marker of colorectal cancer risk. *Science*.  
911 2003;299(5613):1753-5. doi: 10.1126/science.1080902. PubMed PMID: 12637750.
- 912 60. Kaneda A, Wang CJ, Cheong R, Timp W, Onyango P, Wen B, et al. Enhanced  
913 sensitivity to IGF-II signaling links loss of imprinting of IGF2 to increased cell proliferation and  
914 tumor risk. *Proc Natl Acad Sci U S A*. 2007;104(52):20926-31. doi: 10.1073/pnas.0710359105.  
915 PubMed PMID: 18087038; PubMed Central PMCID: PMC2409243.
- 916 61. Sakatani T, Kaneda A, Iacobuzio-Donahue CA, Carter MG, de Boer Witzel S, Okano H,  
917 et al. Loss of imprinting of Igf2 alters intestinal maturation and tumorigenesis in mice. *Science*.  
918 2005;307(5717):1976-8. Epub 2005/02/26. doi: 1108080 [pii]  
919 10.1126/science.1108080. PubMed PMID: 15731405.
- 920 62. Zanella ER, Galimi F, Sassi F, G. M, Cottino F, Leto SM, et al. IGF2 is an actionable  
921 target that identifies a distinct subpopulation of colorectal cancer patients with marginal  
922 response to anti-EGFR therapies. *Sci Transl Med*. 2015;7(272):272ra12. Epub 1/28/2015. doi:  
923 10.1126.

- 924 63. Kinouchi Y, Hiwatashi N, Higashioka S, Nagashima F, Chida M, Toyota T. Relaxation of  
925 imprinting of the insulin-like growth factor II gene in colorectal cancer. *Cancer Lett.*  
926 1996;107(1):105-8. PubMed PMID: 8913273.
- 927 64. Nishihara S, Hayashida T, Mitsuya K, Schulz TC, Ikeguchi M, Kaibara N, et al. Multipoint  
928 imprinting analysis in sporadic colorectal cancers with and without microsatellite instability. *Int J*  
929 *Oncol.* 2000;17(2):317-22. PubMed PMID: 10891541.
- 930 65. Nakagawa H, Chadwick RB, Peltomaki P, Plass C, Nakamura Y, de La Chapelle A. Loss  
931 of imprinting of the insulin-like growth factor II gene occurs by biallelic methylation in a core  
932 region of H19-associated CTCF-binding sites in colorectal cancer. *Proc Natl Acad Sci U S A.*  
933 2001;98(2):591-6. doi: 10.1073/pnas.011528698. PubMed PMID: 11120891; PubMed Central  
934 PMCID: PMC14632.
- 935 66. Zhong H, Fazenbaker C, Chen C, Breen S, Huang J, Yao X, et al. Overproduction of  
936 IGF-2 drives a subset of colorectal cancer cells, which specifically respond to an anti-IGF  
937 therapeutic antibody and combination therapies. *Oncogene.* 2016. doi: 10.1038/onc.2016.248.  
938 PubMed PMID: 27399333.
- 939 67. Berg KCG, Eide PW, Eilertsen IA, Johannessen B, Bruun J, Danielsen SA, et al. Multi-  
940 omics of 34 colorectal cancer cell lines - a resource for biomedical studies. *Mol Cancer.*  
941 2017;16(1):116. doi: 10.1186/s12943-017-0691-y. PubMed PMID: 28683746; PubMed Central  
942 PMCID: PMC5498998.
- 943 68. Sanderson MP, Hofmann MH, Garin-Chesa P, Schweifer N, Wernitznig A, Fischer S, et  
944 al. The IGF1R/INSR Inhibitor BI 885578 Selectively Inhibits Growth of IGF2-Overexpressing  
945 Colorectal Cancer Tumors and Potentiates the Efficacy of Anti-VEGF Therapy. *Mol Cancer*  
946 *Ther.* 2017;16(10):2223-33. doi: 10.1158/1535-7163.MCT-17-0336. PubMed PMID: 28729397.
- 947 69. Cancer Genome Atlas Research N, Weinstein JN, Collisson EA, Mills GB, Shaw KR,  
948 Ozenberger BA, et al. The Cancer Genome Atlas Pan-Cancer analysis project. *Nat Genet.*

- 949 2013;45(10):1113-20. doi: 10.1038/ng.2764. PubMed PMID: 24071849; PubMed Central  
950 PMCID: PMCPMC3919969.
- 951 70. Mokry M, Hatzis P, Schuijers J, Lansu N, Ruzius FP, Clevers H, et al. Integrated  
952 genome-wide analysis of transcription factor occupancy, RNA polymerase II binding and steady-  
953 state RNA levels identify differentially regulated functional gene classes. *Nucleic Acids Res.*  
954 2012;40(1):148-58. doi: 10.1093/nar/gkr720. PubMed PMID: 21914722; PubMed Central  
955 PMCID: PMC3245935.
- 956 71. Muta Y, Fujita Y, Sumiyama K, Sakurai A, Taketo MM, Chiba T, et al. Composite  
957 regulation of ERK activity dynamics underlying tumour-specific traits in the intestine. *Nat*  
958 *Commun.* 2018;9(1):2174. doi: 10.1038/s41467-018-04527-8. PubMed PMID: 29872037;  
959 PubMed Central PMCID: PMCPMC5988836.
- 960 72. Veeman MT, Slusarski DC, Kaykas A, Louie SH, Moon RT. Zebrafish prickle, a  
961 modulator of noncanonical Wnt/Fz signaling, regulates gastrulation movements. *Curr Biol.*  
962 2003;13(8):680-5. PubMed PMID: 12699626.
- 963 73. Hoadley KA, Yau C, Hinoue T, Wolf DM, Lazar AJ, Drill E, et al. Cell-of-Origin Patterns  
964 Dominate the Molecular Classification of 10,000 Tumors from 33 Types of Cancer. *Cell.*  
965 2018;173(2):291-304 e6. doi: 10.1016/j.cell.2018.03.022. PubMed PMID: 29625048; PubMed  
966 Central PMCID: PMCPMC5957518.
- 967 74. Slaymaker IM, Gao L, Zetsche B, Scott DA, Yan WX, Zhang F. Rationally engineered  
968 Cas9 nucleases with improved specificity. *Science.* 2016;351(6268):84-8. doi:  
969 10.1126/science.aad5227. PubMed PMID: 26628643; PubMed Central PMCID: PMC4714946.
- 970 75. Yusa K, Zhou L, Li MA, Bradley A, Craig NL. A hyperactive piggyBac transposase for  
971 mammalian applications. *Proceedings of the National Academy of Sciences of the United States*  
972 *of America.* 2011;108(4):1531-6. Epub 2011/01/06. doi: 10.1073/pnas.1008322108. PubMed  
973 PMID: 21205896; PubMed Central PMCID: PMC3029773.

- 974 76. Cong L, Ran FA, Cox D, Lin S, Barretto R, Habib N, et al. Multiplex genome engineering  
975 using CRISPR/Cas systems. *Science*. 2013;339(6121):819-23. doi: 10.1126/science.1231143.  
976 PubMed PMID: 23287718; PubMed Central PMCID: PMC3795411.
- 977 77. Pinello L, Canver MC, Hoban MD, Orkin SH, Kohn DB, Bauer DE, et al. Analyzing  
978 CRISPR genome-editing experiments with CRISPResso. *Nat Biotechnol*. 2016;34(7):695-7.  
979 Epub 2016/07/13. doi: 10.1038/nbt.3583. PubMed PMID: 27404874; PubMed Central PMCID:  
980 PMC5242601.
- 981 78. Shcherbakova DM, Verkhusha VV. Near-infrared fluorescent proteins for multicolor in  
982 vivo imaging. *Nat Methods*. 2013;10(8):751-4. doi: 10.1038/nmeth.2521. PubMed PMID:  
983 23770755; PubMed Central PMCID: PMC3737237.
- 984 79. Moffat J, Grueneberg DA, Yang X, Kim SY, Kloepfer AM, Hinkle G, et al. A lentiviral  
985 RNAi library for human and mouse genes applied to an arrayed viral high-content screen. *Cell*.  
986 2006;124(6):1283-98. doi: 10.1016/j.cell.2006.01.040. PubMed PMID: 16564017.
- 987 80. Korinek V, Barker N, Morin PJ, van Wichen D, de Weger R, Kinzler KW, et al.  
988 Constitutive transcriptional activation by a beta-catenin-Tcf complex in APC<sup>-/-</sup> colon carcinoma.  
989 *Science*. 1997;275(5307):1784-7. Epub 1997/03/21. PubMed PMID: 9065401.
- 990 81. Kolligs FT, Hu G, Dang CV, Fearon ER. Neoplastic transformation of RK3E by mutant  
991 beta-catenin requires deregulation of Tcf/Lef transcription but not activation of c-myc  
992 expression. *Mol Cell Biol*. 1999;19(8):5696-706. PubMed PMID: 10409758; PubMed Central  
993 PMCID: PMC84421.
- 994

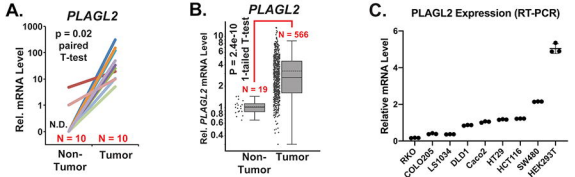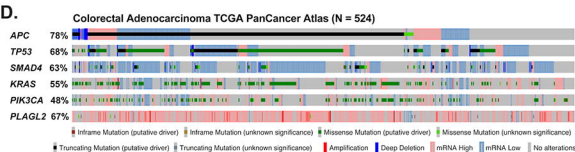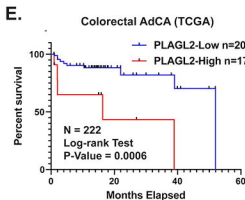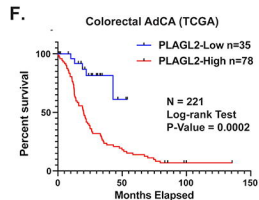



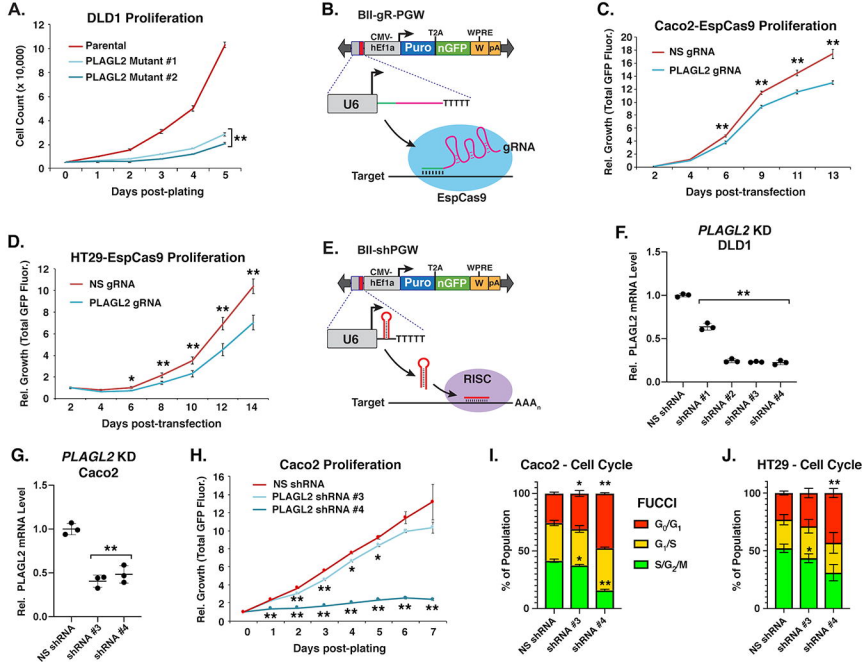

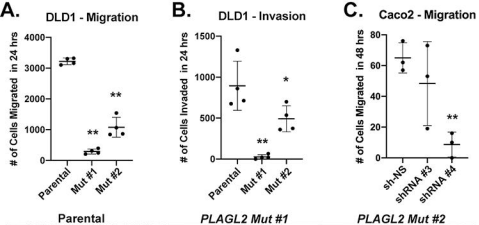

Parental

*PLAGL2* Mut #1

*PLAGL2* Mut #2

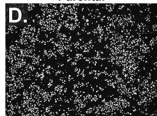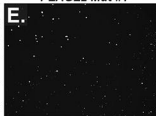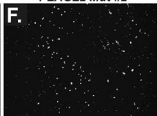

IEC6  
Soft  
Agar  
Colony  
Form.

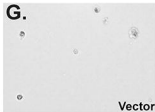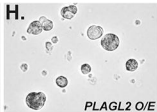

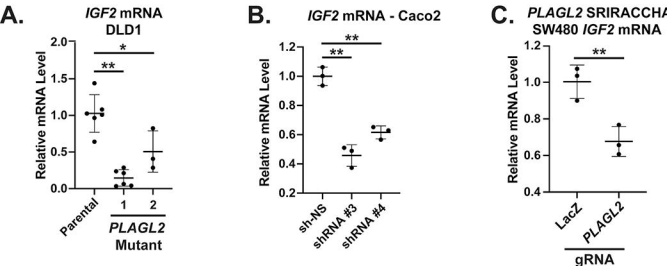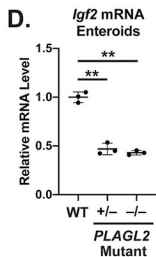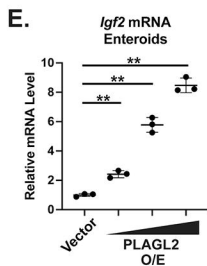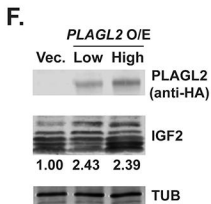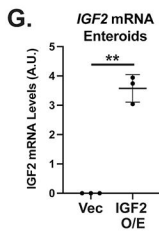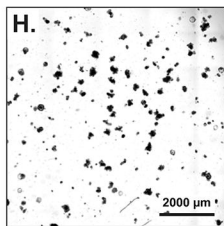

Empty Vector

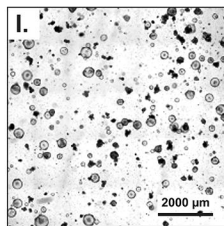

IGF2 O/E

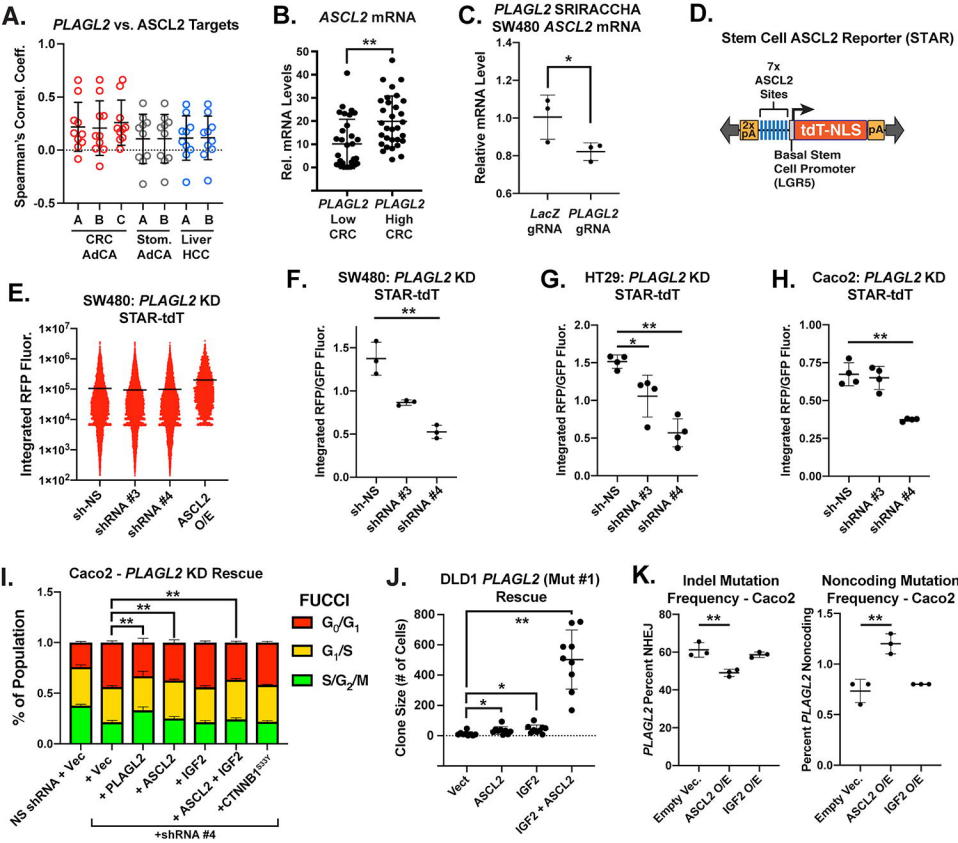

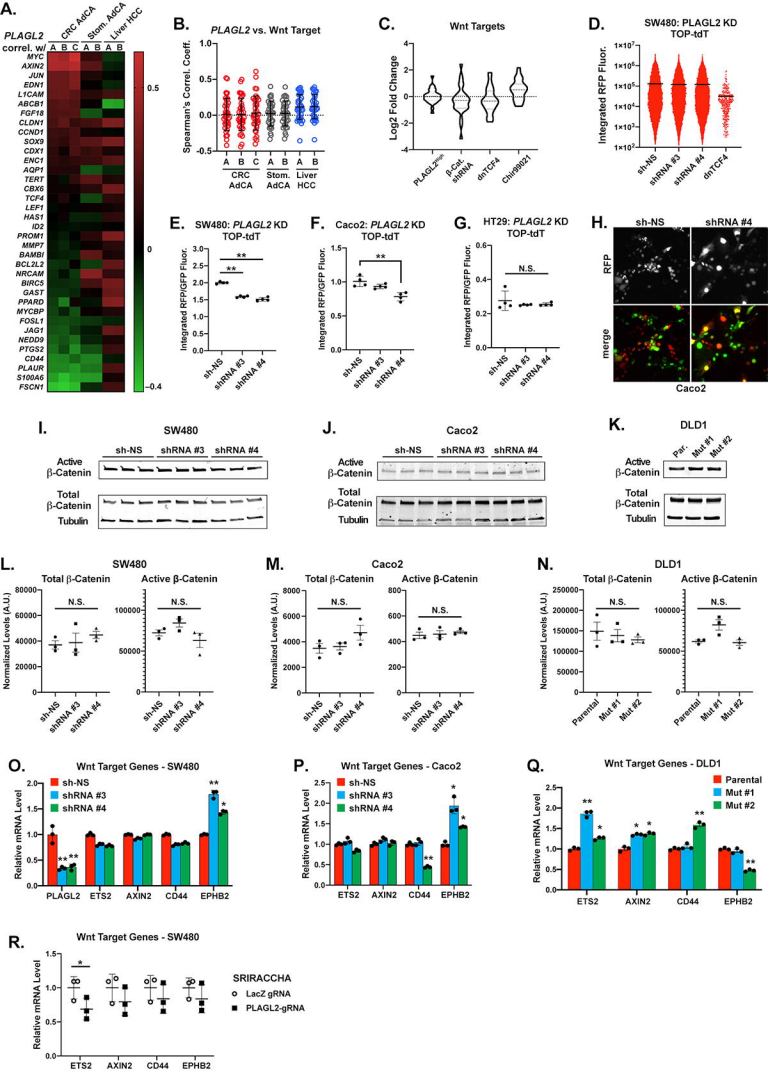

Source: https://www.biorxiv.org/content/10.1101/2020.10.14.339531v3.full.pdf
